# Supplementary material for: Amidic C–N bond cleavage of isatin: chemoselective synthesis of pyrrolo[2,3,4-kl]acridin-1-ones using Ag NPs decorated rGO composite as an efficient and recoverable catalyst under microwave irradiation
Source: Royal Society of Chemistry journal article supplement (doi:10.1039/c5ra11747j), 2015-01-01
Supplement: c5ra11747j1.pdf [file c5ra11747j1.pdf]

**Amidic C-N bond cleavage of isatin: Chemoselective synthesis of pyrrolo[2,3,4-*kl*]acridin-1-ones using Ag NPs decorated rGO composite as an efficient and recoverable catalyst under microwave irradiation**

Anshu Dandia,\*<sup>a</sup> Amit Sharma,<sup>a</sup> Vijay Parewa,<sup>a</sup> Begraj Kumawat,<sup>a</sup> Kuldeep S. Rathore<sup>b</sup> and Amit Sharma<sup>b</sup>

<sup>a</sup>Centre of Advanced Studies, Department of Chemistry,  
University of Rajasthan, Jaipur, India.

<sup>b</sup>Semiconductor and Polymer Science Laboratory, Department of Physics, University of Rajasthan, Jaipur, India.

E-mail<sup>a</sup>: [dranshudandia@yahoo.co.in](mailto:dranshudandia@yahoo.co.in) E-mail<sup>b</sup>: [kuldeep\\_ssr@yahoo.com](mailto:kuldeep_ssr@yahoo.com)

## Supporting Information

| <b>Contents:</b>                                                         | <b>Page No.</b> |
|--------------------------------------------------------------------------|-----------------|
| 1. Calculation of green metrics .....                                    | 2-3             |
| 2. Calculation of percentage yield and turn over frequency (TOF) .....   | 3-4             |
| 3. Characterizations of the compounds .....                              | 4-12            |
| 4. Crystal structural data of compound <b>4b</b> .....                   | 13-14           |
| 5. <sup>1</sup> H and <sup>13</sup> C-NMR spectra of the compounds ..... | 15-34           |
| 6. Mass spectra of the compounds .....                                   | 35-41           |

## 1. Calculation of green metrics:

### 1.1. E-factor calculations:

$$\text{E-factor} = \frac{\text{Total waste (g)}}{\text{Product (g)}} = \frac{\text{Total input (g)} - \text{Total output (g)}}{\text{Total output (g)}}$$

| S. No. | Input (quantity in g)* |            |            |         | Output (quantity in g)* | Total (quantity in g) |            | E-factor = (x - y)/ y |
|--------|------------------------|------------|------------|---------|-------------------------|-----------------------|------------|-----------------------|
|        | Reactant 1             | Reactant 2 | Reactant 3 | Solvent |                         | Input (x)             | Output (y) |                       |
| a.     | 0.294                  | 0.186      | 0.280      | 2.367   | 0.580                   | 3.127                 | 0.580      | 4.39                  |
| b.     | 0.294                  | 0.214      | 0.280      | 2.367   | 0.632                   | 3.155                 | 0.632      | 3.99                  |
| c.     | 0.294                  | 0.256      | 0.280      | 2.367   | 0.650                   | 3.197                 | 0.650      | 3.92                  |
| d.     | 0.294                  | 0.222      | 0.280      | 2.367   | 0.640                   | 3.163                 | 0.640      | 3.94                  |
| e.     | 0.294                  | 0.344      | 0.280      | 2.367   | 0.737                   | 3.285                 | 0.737      | 3.46                  |
| f.     | 0.452                  | 0.214      | 0.280      | 2.367   | 0.754                   | 3.313                 | 0.754      | 3.39                  |
| g.     | 0.452                  | 0.256      | 0.280      | 2.367   | 0.801                   | 3.355                 | 0.801      | 3.19                  |
| h.     | 0.452                  | 0.344      | 0.280      | 2.367   | 0.871                   | 3.443                 | 0.871      | 2.95                  |
| i.     | 0.330                  | 0.186      | 0.280      | 2.367   | 0.640                   | 3.163                 | 0.640      | 3.94                  |
| j.     | 0.330                  | 0.214      | 0.280      | 2.367   | 0.652                   | 3.191                 | 0.652      | 3.89                  |
| k.     | 0.330                  | 0.256      | 0.280      | 2.367   | 0.697                   | 3.233                 | 0.697      | 3.64                  |
| l.     | 0.330                  | 0.344      | 0.280      | 2.367   | 0.770                   | 3.321                 | 0.770      | 3.31                  |
| m.     | 0.384                  | 0.214      | 0.280      | 2.367   | 0.685                   | 3.245                 | 0.685      | 3.74                  |
| n.     | 0.384                  | 0.256      | 0.280      | 2.367   | 0.731                   | 3.287                 | 0.731      | 3.50                  |
| o.     | 0.322                  | 0.344      | 0.280      | 2.367   | 0.771                   | 3.313                 | 0.771      | 3.30                  |
| p.     | 0.322                  | 0.186      | 0.280      | 2.367   | 0.605                   | 3.155                 | 0.605      | 4.21                  |

\* Since the catalyst was recovered during the reaction, therefore it's used amount is not included in the calculations.

### 1.2. Calculation of Atom Economy:

$$\text{Atom Economy} = \frac{\text{Molecular weight of the product}}{\text{Sum of the molecular weights of reactants}} \times 100$$

$$\text{e.g. For the product } \mathbf{4b}; \text{ Atom Economy} = \frac{340}{147 + 107 + 140} \times 100$$

$$\text{Atom Economy} = 86.29 \%$$

## 2. Calculation of percentage yield and turn over frequency (TOF):

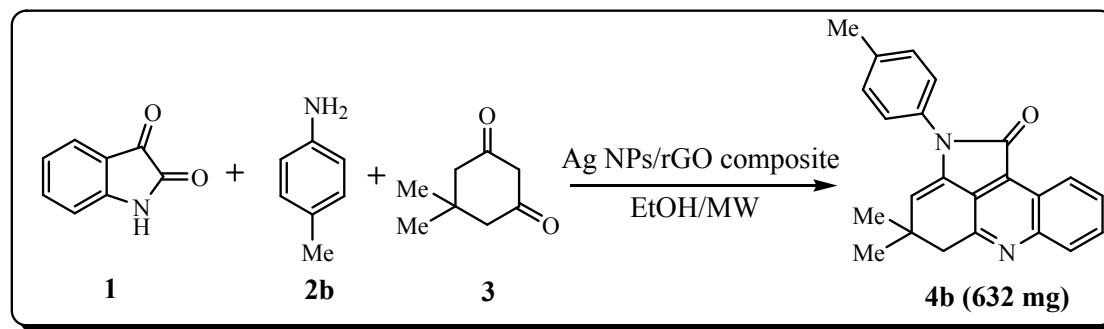

### 2.1. Calculation of %ge yield:

$$\%ge \text{ yield} = \frac{\text{Experimental yield}}{\text{Theoretical yield}} \times 100$$

$$\text{e.g. For the product } \mathbf{4b}; \%ge \text{ yield} = \frac{632 \text{ mg}}{680 \text{ mg}} \times 100$$

$$\%ge \text{ yield} = 92.94 \%$$

### 2.2. Calculation of TOF value:

$$\text{TOF (Turn Over Frequency)} = \frac{\text{No. of moles of final product produced}}{\text{Amount of loaded catalyst} \times \text{Time}}$$

$$\text{wt\% of loaded catalyst} = \frac{\text{Amount of loaded catalyst}}{\text{Total amount}} \times 100$$

e.g. For the product **4b**; Assuming amount of loaded catalyst = x gm

$$\frac{4}{100} = \frac{x}{0.294 + 0.280 + 0.214 + x} = \frac{x}{0.788 + x}$$

$$x = \frac{3.152}{96} = 0.033 \text{ g}$$

$$\text{TOF} = \frac{0.632}{340 \times 0.033 \times 2} = 0.02816 \text{ mol g}^{-1} \text{ min}^{-1}$$

$$\text{TOF} = 28.16 \times 10^{-3} \text{ mol g}^{-1} \text{ min}^{-1}$$

### 3. Characterizations of the compounds:

#### 4,4-Dimethyl-2-phenyl-4,5-dihydro-2H-pyrrolo[2,3,4-kl]acridin-1-one (4a: 89 %, 0.580 g)

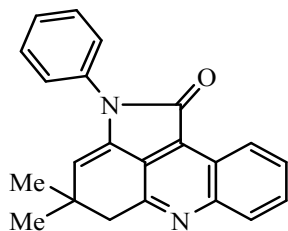

Yellow solid, m.p. 191-193 °C; <sup>1</sup>H NMR (400 MHz, CDCl<sub>3</sub>) (δ, ppm): 8.60 (d, *J* = 8.0 Hz, 1H, ArH), 8.12 (d, *J* = 8.4 Hz, 1H, ArH), 7.85-7.75 (m, 2H, ArH), 7.65-7.49 (m, 5H, ArH), 5.66 (s, 1H, =C-H), 3.15 (s, 2H, CH<sub>2</sub>), 1.25 (s, 6H, 2xCH<sub>3</sub>); <sup>13</sup>C NMR (100 MHz, CDCl<sub>3</sub>) (δ, ppm): 165.8 (>C=O), 154.2, 150.2 (Ar-C), 136.9 (=CH-C-N), 133.7, 132.4, 131.8, 129.5, 128.1, 127.6, 126.5, 126.2,

124.2, 123.5, 122.2 (Ar-C), 119.8 (=C-H), 44.1 (CH<sub>2</sub>), 36.8 (CH<sub>3</sub>-C-CH<sub>3</sub>), 30.4 (CH<sub>3</sub>-C-CH<sub>3</sub>); IR (KBr,  $\nu$ , cm<sup>-1</sup>): 3035, 2940, 1695, 1650, 1530, 1460, 1342, 1097, 774; MS (ESI) m/z: 326 [M]<sup>+</sup>.

**4,4-Dimethyl-2-*p*-tolyl-4,5-dihydro-2*H*-pyrrolo[2,3,4-*kl*]acridin-1-one (4b: 93 %, 0.632 g)**

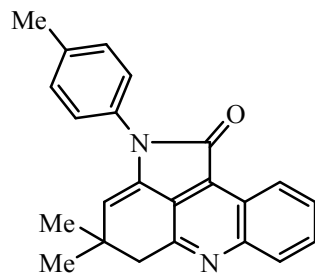

Yellow solid, m.p. 218-220 °C; <sup>1</sup>H NMR (400 MHz, CDCl<sub>3</sub>) ( $\delta$ , ppm): 8.64 (d,  $J$  = 8.0 Hz, 1H, ArH), 8.08 (d,  $J$  = 8.4 Hz, 1H, ArH), 7.67-7.57 (m, 2H, ArH), 7.31-7.25 (m, 4H, ArH), 5.51 (s, 1H, =C-H), 3.13 (s, 2H, CH<sub>2</sub>), 2.35 (s, 3H, CH<sub>3</sub>), 1.24 (s, 6H, 2xCH<sub>3</sub>); <sup>13</sup>C NMR (100 MHz, CDCl<sub>3</sub>) ( $\delta$ , ppm): 166.8 (>C=O), 154.6, 149.6 (Ar-C), 137.5 (=CH-C-N), 133.5, 132.0, 130.0, 129.5, 129.4, 127.7, 126.4, 126.3, 125.1, 124.3, 122.6 (Ar-C), 118.2 (=C-H), 44.2 (CH<sub>2</sub>), 37.1 (CH<sub>3</sub>-C-CH<sub>3</sub>), 30.9 (CH<sub>3</sub>-C-CH<sub>3</sub>), 21.1 (Ar-CH<sub>3</sub>); IR (KBr,  $\nu$ , cm<sup>-1</sup>): 3040, 2960, 1700, 1655, 1520, 1465, 1350, 1120, 775; MS (ESI) m/z: 340 [M]<sup>+</sup>.

**2-(4-Chlorophenyl)-4,4-dimethyl-4,5-dihydro-2*H*-pyrrolo[2,3,4-*kl*]acridin-1-one (4c: 90 %, 0.650 g)**

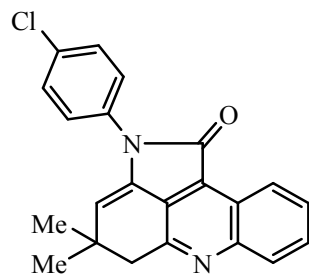

Yellow solid, m.p. 189-190 °C; <sup>1</sup>H NMR (400 MHz, DMSO-*d*<sub>6</sub>) ( $\delta$ , ppm): 8.56 (d,  $J$  = 7.2 Hz, 1H, ArH), 8.16 (d,  $J$  = 8.0 Hz, 1H, ArH), 7.86-7.84 (m, 1H, ArH), 7.72-7.56 (m, 1H, ArH), 7.67-7.57 (m, 4H, ArH), 5.81 (s, 1H, =C-H), 3.18 (s, 2H, CH<sub>2</sub>), 1.29 (s, 6H, 2xCH<sub>3</sub>); <sup>13</sup>C NMR (100 MHz, DMSO-*d*<sub>6</sub>) ( $\delta$ , ppm): 165.7 (>C=O), 154.7, 148.8 (Ar-C), 133.2 (=CH-C-N), 132.0, 131.7, 129.5, 129.3,

128.1, 127.9, 126.1, 125.4, 123.6, 123.2, 121.6 (Ar-C), 119.2 (=C-H), 43.1 (CH<sub>2</sub>), 36.8 (CH<sub>3</sub>-C-CH<sub>3</sub>), 30.1 (CH<sub>3</sub>-C-CH<sub>3</sub>); IR (KBr,  $\nu$ , cm<sup>-1</sup>): 3033, 2950, 1700, 1645, 1530, 1450, 1345, 1110, 820; MS (ESI) m/z: 361 [M]<sup>+</sup>.

**2-(4-Fluorophenyl)-4,4-dimethyl-4,5-dihydro-2H-pyrrolo[2,3,4-kl]acridin-1-one (4d: 93 %, 0.640 g)**

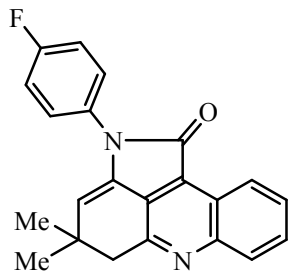

Yellow solid, m.p. 186-187 °C; <sup>1</sup>H NMR (400 MHz, CDCl<sub>3</sub>) ( $\delta$ , ppm): 8.58 (d,  $J$  = 7.8 Hz, 1H, ArH), 8.14 (d,  $J$  = 8.2 Hz, 1H, ArH), 7.90-7.80 (m, 2H, ArH), 7.70-7.62 (m, 4H, ArH), 5.60 (s, 1H, =C-H), 3.16 (s, 2H, CH<sub>2</sub>), 1.25 (s, 6H, 2xCH<sub>3</sub>); <sup>13</sup>C NMR (100 MHz, CDCl<sub>3</sub>) ( $\delta$ , ppm): 166.2 (>C=O), 153.4, 149.2 (Ar-C), 136.8 (=CH-C-N), 132.8, 132.2, 130.4, 129.2, 128.8, 127.9, 126.6, 126.3, 125.4, 124.5, 122.8 (Ar-C), 118.4 (=C-H), 44.6 (CH<sub>2</sub>), 37.4 (CH<sub>3</sub>-C-CH<sub>3</sub>), 31.2 (CH<sub>3</sub>-C-CH<sub>3</sub>); IR (KBr,  $\nu$ , cm<sup>-1</sup>): 3036, 2960, 1705, 1650, 1525, 1460, 1335, 1115, 790; MS (ESI) m/z: 344 [M]<sup>+</sup>.

**2-(4-Bromophenyl)-4,4-dimethyl-4,5-dihydro-2H-pyrrolo[2,3,4-kl]acridin-1-one (4e: 91 %, 0.737 g)**

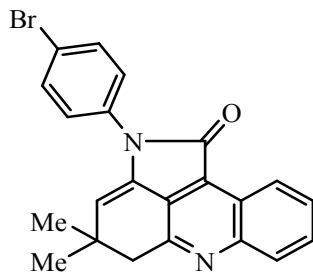

Yellow solid, m.p. 189-191 °C; <sup>1</sup>H NMR (400 MHz, CDCl<sub>3</sub>) ( $\delta$ , ppm): 8.58 (d,  $J$  = 7.6 Hz, 1H, ArH), 8.22 (d,  $J$  = 8.2 Hz, 1H, ArH), 7.97-7.85 (m, 2H, ArH), 7.76-7.64 (m, 4H, ArH), 5.85 (s, 1H, =C-H), 3.21 (s, 2H, CH<sub>2</sub>), 1.29 (s, 6H, 2xCH<sub>3</sub>); <sup>13</sup>C NMR (100 MHz, CDCl<sub>3</sub>) ( $\delta$ , ppm): 165.9 (>C=O), 155.1, 150.3 (Ar-C), 134.1 (=CH-C-N), 133.1, 132.1, 131.9, 129.5, 129.1, 127.6, 126.6, 124.1,

123.6, 122.2, 121.3 (Ar-C), 118.9 (=C-H), 43.9 (CH<sub>2</sub>), 36.8 (CH<sub>3</sub>-C-CH<sub>3</sub>), 30.6 (CH<sub>3</sub>-C-CH<sub>3</sub>); IR (KBr,  $\nu$ , cm<sup>-1</sup>): 3030, 2950, 1700, 1650, 1500, 1540, 1450, 1350, 1120, 820; MS (ESI) m/z: 405 [M]<sup>+</sup>.

**9-Bromo-4,4-dimethyl-2-*p*-tolyl-4,5-dihydro-2*H*-pyrrolo[2,3,4-*kl*]acridin-1-one (4f: 90 %, 0.754 g)**

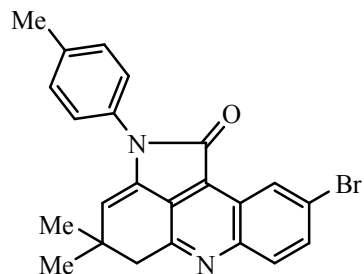

Yellow solid, m.p. 204-206 °C; <sup>1</sup>H NMR (400 MHz, CDCl<sub>3</sub>) ( $\delta$ , ppm): 8.85 (s, 1H, ArH), 7.99 (d,  $J$  = 8.8 Hz, 1H, ArH), 7.79 (d,  $J$  = 8.4 Hz, 1H, ArH), 7.35 (d,  $J$  = 3.2 Hz, 4H, ArH), 5.64 (s, 1H, =C-H), 3.18 (s, 2H, CH<sub>2</sub>), 2.44 (s, 3H, CH<sub>3</sub>), 1.32 (s, 6H, 2xCH<sub>3</sub>); <sup>13</sup>C NMR (100 MHz, CDCl<sub>3</sub>) ( $\delta$ , ppm): 166.2 (>C=O), 155.0, 148.2 (Ar-C), 137.5 (=CH-C-N), 133.2, 132.7, 131.8, 130.9, 130.0, 127.8, 126.7, 126.3, 124.0, 123.6, 122.0 (Ar-C), 119.1 (=C-H), 44.1 (CH<sub>2</sub>), 37.1 (CH<sub>3</sub>-C-CH<sub>3</sub>), 30.9 (CH<sub>3</sub>-C-CH<sub>3</sub>), 21.2 (Ar-CH<sub>3</sub>); IR (KBr,  $\nu$ , cm<sup>-1</sup>): 3030, 2950, 1705, 1650, 1510, 1455, 1350, 1120, 810; MS (ESI) m/z: 420 [M+H]<sup>+</sup>.

**9-Bromo-2-(4-chlorophenyl)-4,4-dimethyl-4,5-dihydro-2*H*-pyrrolo[2,3,4-*kl*]acridin-1-one (4g: 91 %, 0.801 g)**

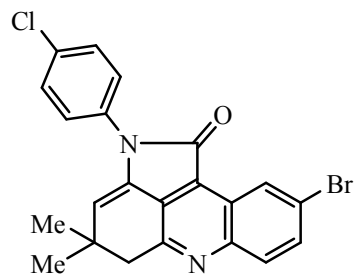

Yellow solid, m.p. 219-221 °C; <sup>1</sup>H NMR (400 MHz, CDCl<sub>3</sub>) ( $\delta$ , ppm): 8.81 (d,  $J$  = 2.0 Hz, 1H, ArH), 7.99 (d,  $J$  = 9.2 Hz, 1H, ArH), 7.80 (dd,  $J_1$  = 2.4 Hz,  $J_2$  = 2.0 Hz, 1H, ArH), 7.52- 7.43 (m, 4H, ArH), 5.66 (s, 1H, =C-H), 3.19 (s, 2H, CH<sub>2</sub>), 1.34 (s, 6H, 2xCH<sub>3</sub>); <sup>13</sup>C NMR (100 MHz, CDCl<sub>3</sub>) ( $\delta$ , ppm): 166.0 (>C=O), 155.0, 148.2 (Ar-C), 133.2 (=CH-C-N), 133.0, 132.8, 131.0, 129.6, 127.5, 126.9,

126.4, 123.7, 123.4, 122.2, (Ar-C), 119.3 (=C-H), 44.0 (CH<sub>2</sub>), 37.2 (CH<sub>3</sub>-C-CH<sub>3</sub>), 30.8 (CH<sub>3</sub>-C-CH<sub>3</sub>); IR (KBr,  $\nu$ , cm<sup>-1</sup>): 3035, 2950, 1700, 1655, 1500, 1450, 1350, 1120, 820; MS (ESI) m/z: 440 [M]<sup>+</sup>.

**9-Bromo-2-(4-bromophenyl)-4,4-dimethyl-4,5-dihydro-2H-pyrrolo[2,3,4-kl]acridin-1-one (4h: 90 %, 0.871 g)**

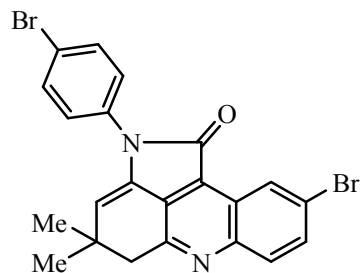

Yellow solid, m.p. 185-187 °C; <sup>1</sup>H NMR (400 MHz, CDCl<sub>3</sub>) ( $\delta$ , ppm): 8.72 (d,  $J$  = 2.0 Hz, 1H, ArH), 7.96-7.82 (m, 2H, ArH), 7.62-7.51 (m, 4H, ArH), 5.72 (s, 1H, =C-H), 3.19 (s, 2H, CH<sub>2</sub>), 1.33 (s, 6H, 2xCH<sub>3</sub>); <sup>13</sup>C NMR (100 MHz, CDCl<sub>3</sub>) ( $\delta$ , ppm): 166.4 (>C=O), 155.2, 149.0 (Ar-C), 134.2 (=CH-C-N), 133.3, 132.2, 131.7, 130.8, 127.4, 126.6, 126.1, 124.1, 123.6, 122.1, 121.4 (Ar-C), 119.1 (=C-H), 44.2 (CH<sub>2</sub>), 37.1 (CH<sub>3</sub>-C-CH<sub>3</sub>), 30.6 (CH<sub>3</sub>-C-CH<sub>3</sub>); IR (KBr,  $\nu$ , cm<sup>-1</sup>): 3030, 2940, 1705, 1650, 1490, 1450, 1345, 1125, 815; MS (ESI) m/z: 484 [M]<sup>+</sup>.

**9-Fluoro-4,4-dimethyl-2-phenyl-4,5-dihydro-2H-pyrrolo[2,3,4-kl]acridin-1-one (4i: 93 %, 0.640 g)**

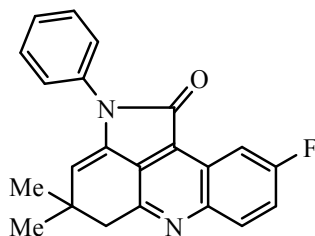

Yellow solid, m.p. 160-162 °C; <sup>1</sup>H NMR (400 MHz, CDCl<sub>3</sub>) ( $\delta$ , ppm): 8.20 (d,  $J$  = 3.6 Hz, 1H, ArH), 7.92-7.88 (m, 1H, ArH), 7.65-7.48 (m, 6H, ArH), 5.67 (s, 1H, =C-H), 3.18 (s, 2H, CH<sub>2</sub>), 1.29 (s, 6H, 2xCH<sub>3</sub>); <sup>13</sup>C NMR (100 MHz, CDCl<sub>3</sub>) ( $\delta$ , ppm): 166.2 (>C=O), 162.6, 159.9, 153.6, 146.4 (Ar-C), 137.6 (=CH-C-N), 133.6, 131.7, 131.1, 129.2, 126.9, 126.4, 124.6 (Ar-C), 119.4 (=C-H), 119.1,



108.0 (Ar-C), 43.5 (CH<sub>2</sub>), 37.2 (CH<sub>3</sub>-C-CH<sub>3</sub>), 30.9 (CH<sub>3</sub>-C-CH<sub>3</sub>); IR (KBr, ν, cm<sup>-1</sup>): 3030, 2950, 1700, 1640, 1495, 1450, 1380, 1125, 820; MS (ESI) m/z: 344 [M]<sup>+</sup>.

**9-Fluoro-4,4-dimethyl-2-*p*-tolyl-4,5-dihydro-2*H*-pyrrolo[2,3,4-*kl*]acridin-1-one (4j: 91%, 0.652 g)**

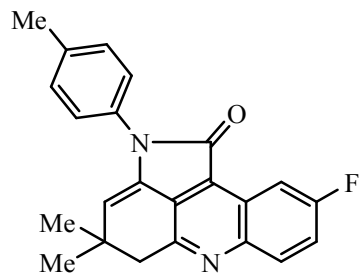

Yellow solid, m.p. 181-183 °C; <sup>1</sup>H NMR (400 MHz, CDCl<sub>3</sub>) (δ, ppm): 8.33 (d, *J* = 2.8 Hz, 1H, ArH), 8.32- 8.12 (m, 1H, ArH), 7.51- 7.33 (m, 5H, ArH), 5.63 (s, 1H, =C-H), 3.19 (s, 2H, CH<sub>2</sub>), 2.44 (s, 3H, CH<sub>3</sub>), 1.32 (s, 6H, 2xCH<sub>3</sub>); <sup>13</sup>C NMR (100 MHz, CDCl<sub>3</sub>) (δ, ppm): 166.4 (>C=O), 162.5, 160.1, 153.8, 146.7 (Ar-C), 137.5 (=CH-C-N), 133.3, 131.7, 130.0, 126.9, 126.2, 124.7, 123.3 (Ar-C), 119.3 (=C-H), 119.0, 108.3 (Ar-C), 43.9 (CH<sub>2</sub>), 37.1 (CH<sub>3</sub>-C-CH<sub>3</sub>), 30.8 (CH<sub>3</sub>-C-CH<sub>3</sub>), 21.2 (Ar-CH<sub>3</sub>); IR (KBr, ν, cm<sup>-1</sup>): 3035, 2955, 1705, 1650, 1505, 1455, 1330, 1125, 825; MS (ESI) m/z: 358 [M]<sup>+</sup>.

**2-(4-Chlorophenyl)-9-fluoro-4,4-dimethyl-4,5-dihydro-2*H*-pyrrolo[2,3,4-*kl*]acridin-1-one (4k: 92 %, 0.697 g)**

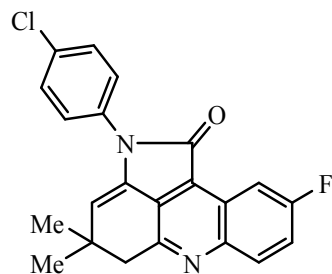

Yellow solid, m.p. 183-185 °C; <sup>1</sup>H NMR (400 MHz, CDCl<sub>3</sub>) (δ, ppm): 8.28 (d, *J* = 6.4 Hz, 1H, ArH), 8.27- 8.12 (m, 1H, ArH), 7.52- 7.44 (m, 5H, ArH), 5.65 (s, 1H, =C-H), 3.20 (s, 2H, CH<sub>2</sub>), 1.34 (s, 6H, 2xCH<sub>3</sub>); <sup>13</sup>C NMR (100 MHz, CDCl<sub>3</sub>) (δ, ppm): 166.2 (>C=O), 162.6, 160.1, 153.7, 146.7 (Ar-C), 133.2 (=CH-C-N), 133.0, 131.7, 129.6, 127.5, 126.9, 124.5, 123.2 (Ar-C), 119.5 (=C-H), 119.1,

108.2 (Ar-C), 43.9 (CH<sub>2</sub>), 37.2 (CH<sub>3</sub>-C-CH<sub>3</sub>), 30.8 (CH<sub>3</sub>-C-CH<sub>3</sub>); IR (KBr, ν, cm<sup>-1</sup>): 3030, 2960, 1700, 1640, 1500, 1450, 1320, 1120, 815; MS (ESI) m/z: 379 [M]<sup>+</sup>.

**2-(4-Bromophenyl)-9-fluoro-4,4-dimethyl-4,5-dihydro-2H-pyrrolo[2,3,4-kl]acridin-1-one (4l: 91 %, 0.770 g)**

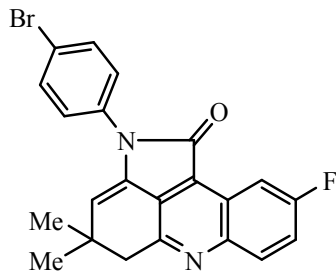

Yellow solid, m.p. 173-175 °C; <sup>1</sup>H NMR (400 MHz, CDCl<sub>3</sub>) (δ, ppm): 8.34 (d, *J* = 7.2 Hz, 1H, ArH), 7.99-7.89 (m, 1H, ArH), 7.56-7.42 (m, 5H, ArH), 5.71 (s, 1H, =C-H), 3.16 (s, 2H, CH<sub>2</sub>), 1.31 (s, 6H, 2×CH<sub>3</sub>); <sup>13</sup>C NMR (100 MHz, CDCl<sub>3</sub>) (δ, ppm): 166.5 (>C=O), 162.9, 159.2, 155.4, 145.4 (Ar-C), 133.8 (=CH-C-N), 132.9, 132.2, 131.7, 130.8, 127.6, 126.8, 124.5 (Ar-C), 119.5 (=C-H), 118.9, 108.2 (Ar-C), 44.1 (CH<sub>2</sub>), 37.1 (CH<sub>3</sub>-C-CH<sub>3</sub>), 30.7 (CH<sub>3</sub>-C-CH<sub>3</sub>); IR (KBr, ν, cm<sup>-1</sup>): 3035, 2955, 1705, 1650, 1500, 1455, 1370, 1110, 815; MS (ESI) m/z: 423 [M]<sup>+</sup>.

**4,4-Dimethyl-9-nitro-2-*p*-tolyl-4,5-dihydro-2H-pyrrolo[2,3,4-kl]acridin-1-one (4m: 89 %, 0.685 g)**

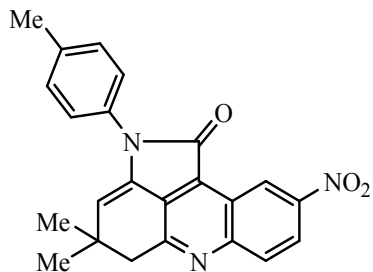

Yellow solid, m.p. 270-272 °C; <sup>1</sup>H NMR (400 MHz, CDCl<sub>3</sub>) (δ, ppm): 8.58 (d, *J* = 5.6 Hz, 1H, ArH), 8.35- 8.10 (m, 2H, ArH), 7.68-7.43 (m, 4H, ArH), 5.82 (s, 1H, =C-H), 3.22 (s, 2H, CH<sub>2</sub>), 2.51 (s, 3H, CH<sub>3</sub>), 1.31 (s, 6H, 2×CH<sub>3</sub>); <sup>13</sup>C NMR (100 MHz, CDCl<sub>3</sub>) (δ, ppm): 166.5 (>C=O), 155.8, 148.9 (Ar-C), 134.6 (=CH-C-N), 133.6, 132.9, 131.2, 130.8, 130.1, 127.9, 127.1, 126.8, 124.1, 123.6,

122.8 (Ar-C), 119.8 (=C-H), 44.6 (CH<sub>2</sub>), 37.4 (CH<sub>3</sub>-C-CH<sub>3</sub>), 31.1 (CH<sub>3</sub>-C-CH<sub>3</sub>) 21.2 (Ar-CH<sub>3</sub>); IR (KBr,  $\nu$ , cm<sup>-1</sup>): 3035, 2955, 1710, 1650, 1500, 1555, 1455, 1365, 1115, 815; MS (ESI) m/z: 403 [M+H<sub>2</sub>O]<sup>+</sup>.

**2-(4-Chlorophenyl)-4,4-dimethyl-9-nitro-4,5-dihydro-2H-pyrrolo[2,3,4-kl]acridin-1-one (4n: 90 %, 0.731 g)**

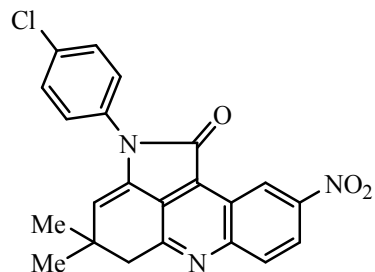

Yellow solid, m.p. 274-276 °C; <sup>1</sup>H NMR (400 MHz, CDCl<sub>3</sub>) ( $\delta$ , ppm): 8.83 (d,  $J$  = 2.0 Hz, 1H, ArH), 8.00 (d,  $J$  = 8.8 Hz, 1H, ArH), 7.82 (dd,  $J_1$  = 2.4 Hz,  $J_2$  = 2.0 Hz, 1H, ArH), 7.53- 7.44 (m, 4H, ArH), 5.66 (s, 1H, =C-H), 3.19 (s, 2H, CH<sub>2</sub>), 1.34 (s, 6H, 2xCH<sub>3</sub>); <sup>13</sup>C NMR (100 MHz, CDCl<sub>3</sub>) ( $\delta$ , ppm): 166.0 (>C=O), 154.9, 148.2 (Ar-C), 133.2 (=CH-C-N), 133.0, 132.8, 131.0, 129.6, 127.5, 126.9, 126.4, 123.8, 123.4, 122.2, (Ar-C), 119.2 (=C-H), 44.0 (CH<sub>2</sub>), 37.2 (CH<sub>3</sub>-C-CH<sub>3</sub>), 30.8 (CH<sub>3</sub>-C-CH<sub>3</sub>); IR (KBr,  $\nu$ , cm<sup>-1</sup>): 3030, 2940, 1700, 1645, 1510, 1550, 1450, 1360, 1110, 820; MS (ESI) m/z: 406 [M]<sup>+</sup>.

**2-(4-Bromophenyl)-4,4,9-trimethyl-4,5-dihydro-2H-pyrrolo[2,3,4-kl]acridin-1-one (4o: 92 %, 0.771 g)**

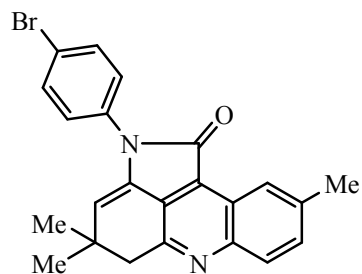

Yellow solid, m.p. 164-165 °C; <sup>1</sup>H NMR (400 MHz, CDCl<sub>3</sub>) ( $\delta$ , ppm): 8.22 (d,  $J$  = 8.4 Hz, 1H, ArH), 7.84 (d,  $J$  = 8.2 Hz, 1H, ArH), 7.72-7.68 (m, 1H, ArH), 7.58-7.42 (m, 4H, ArH), 5.65 (s, 1H, =C-H), 3.10 (s, 2H, CH<sub>2</sub>), 2.49 (s, 3H, CH<sub>3</sub>), 1.24 (s, 6H, 2xCH<sub>3</sub>); <sup>13</sup>C NMR (100 MHz, CDCl<sub>3</sub>) ( $\delta$ , ppm): 166.7 (>C=O), 154.2, 148.6 (Ar-C), 137.4 (=CH-C-N), 134.8, 133.1, 132.6, 131.8, 129.7, 128.4,

126.5, 123.6, 122.2, 121.4, 120.6 (Ar-C), 119.4 (=C-H), 44.3 (CH<sub>2</sub>), 37.6 (CH<sub>3</sub>-C-CH<sub>3</sub>), 30.2 (CH<sub>3</sub>-C-CH<sub>3</sub>), 21.5 (Ar-CH<sub>3</sub>); IR (KBr, ν, cm<sup>-1</sup>): 3040, 2940, 1705, 1645, 1550, 1510, 1450, 1350, 1115, 820; MS (ESI) m/z: 419 [M]<sup>+</sup>.

**4,4,9-Trimethyl-2-phenyl-4,5-dihydro-2H-pyrrolo[2,3,4-kl]acridin-1-one (4p: 89 %, 0.605 g)**

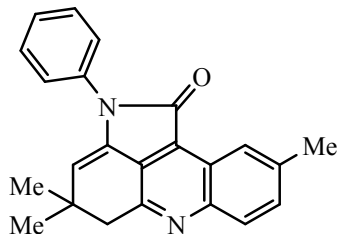

Yellow solid, m.p. 200-202 °C; <sup>1</sup>H NMR (400 MHz, CDCl<sub>3</sub>) (δ, ppm): 8.86 (d, *J* = 8.6 Hz, 1H, ArH), 8.08 (d, *J* = 8.2 Hz, 1H, ArH), 7.68-7.64 (m, 1H, ArH), 7.58-7.24 (m, 5H, ArH), 5.51 (s, 1H, =C-H), 3.12 (s, 2H, CH<sub>2</sub>), 2.35 (s, 3H, CH<sub>3</sub>), 1.23 (s, 6H, 2xCH<sub>3</sub>); <sup>13</sup>C NMR (100 MHz, CDCl<sub>3</sub>) (δ, ppm): 166.8(>C=O), 154.6, 149.7 (Ar-C), 137.5 (=CH-C-N), 133.5, 132.1, 130.0, 129.5, 129.4, 127.7, 126.4, 126.3, 125.0, 124.3, 122.6 (Ar-C), 118.2 (=C-H), 44.2 (CH<sub>2</sub>), 37.2 (CH<sub>3</sub>-C-CH<sub>3</sub>), 30.9 (CH<sub>3</sub>-C-CH<sub>3</sub>), 21.2 (Ar-CH<sub>3</sub>); IR (KBr, ν, cm<sup>-1</sup>): 3035, 2945, 1700, 1650, 1505, 1445, 1370, 1120, 825; MS (ESI) m/z: 340 [M]<sup>+</sup>.

#### 4. Crystal structural data of compound 4b-

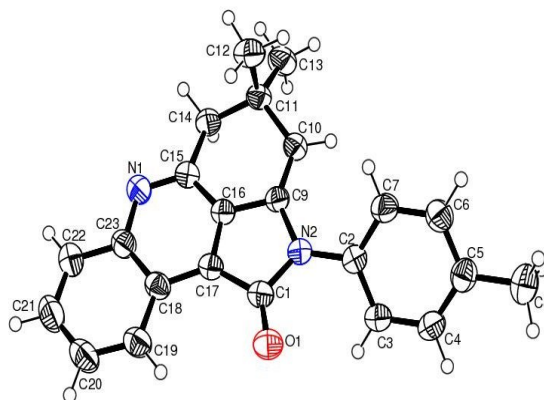

Table 1. Crystal data and structure refinement for uor005.

|                             |                                                                                                                                         |
|-----------------------------|-----------------------------------------------------------------------------------------------------------------------------------------|
| Identification code         | uor005                                                                                                                                  |
| Empirical formula           | C <sub>23</sub> H <sub>20</sub> N <sub>2</sub> O                                                                                        |
| Formula weight              | 340.41                                                                                                                                  |
| Temperature                 | 150(2) K                                                                                                                                |
| Wavelength                  | 0.71073 Å                                                                                                                               |
| Crystal system, space group | Triclinic, P -1                                                                                                                         |
| Unit cell dimensions        | a = 9.7936(7) Å    alpha = 110.403(5) deg.<br>b = 10.0349(4) Å    beta = 101.163(6) deg.<br>c = 10.3079(6) Å    gamma = 102.888(5) deg. |

---

|                                   |                                             |
|-----------------------------------|---------------------------------------------|
| Volume                            | 883.80 (9) Å <sup>3</sup>                   |
| Z, Calculated density             | 2, 1.279 Mg/m <sup>3</sup>                  |
| Absorption coefficient            | 0.079 mm <sup>-1</sup>                      |
| F(000)                            | 360                                         |
| Crystal size                      | 0.23 x 0.18 x 0.13 mm                       |
| Theta range for data collection   | 3.26 to 25.00 deg.                          |
| Limiting indices                  | -8<=h<=11, -11<=k<=11, -12<=l<=12           |
| Reflections collected / unique    | 6407 / 3110 [R(int) = 0.0165]               |
| Completeness to theta = 25.00     | 99.8 %                                      |
| Absorption correction             | Semi-empirical from equivalents             |
| Max. and min. transmission        | 0.9898 and 0.9821                           |
| Refinement method                 | Full-matrix least-squares on F <sup>2</sup> |
| Data / restraints / parameters    | 3110 / 0 / 239                              |
| Goodness-of-fit on F <sup>2</sup> | 1.081                                       |
| Final R indices [I>2sigma(I)]     | R1 = 0.0425, wR2 = 0.1143                   |
| R indices (all data)              | R1 = 0.0494, wR2 = 0.1195                   |
| Extinction coefficient            | 0.016 (3)                                   |
| Largest diff. peak and hole       | 0.173 and -0.142 e.Å <sup>-3</sup>          |

5.  $^1\text{H}$  and  $^{13}\text{C}$ -NMR spectra of the compounds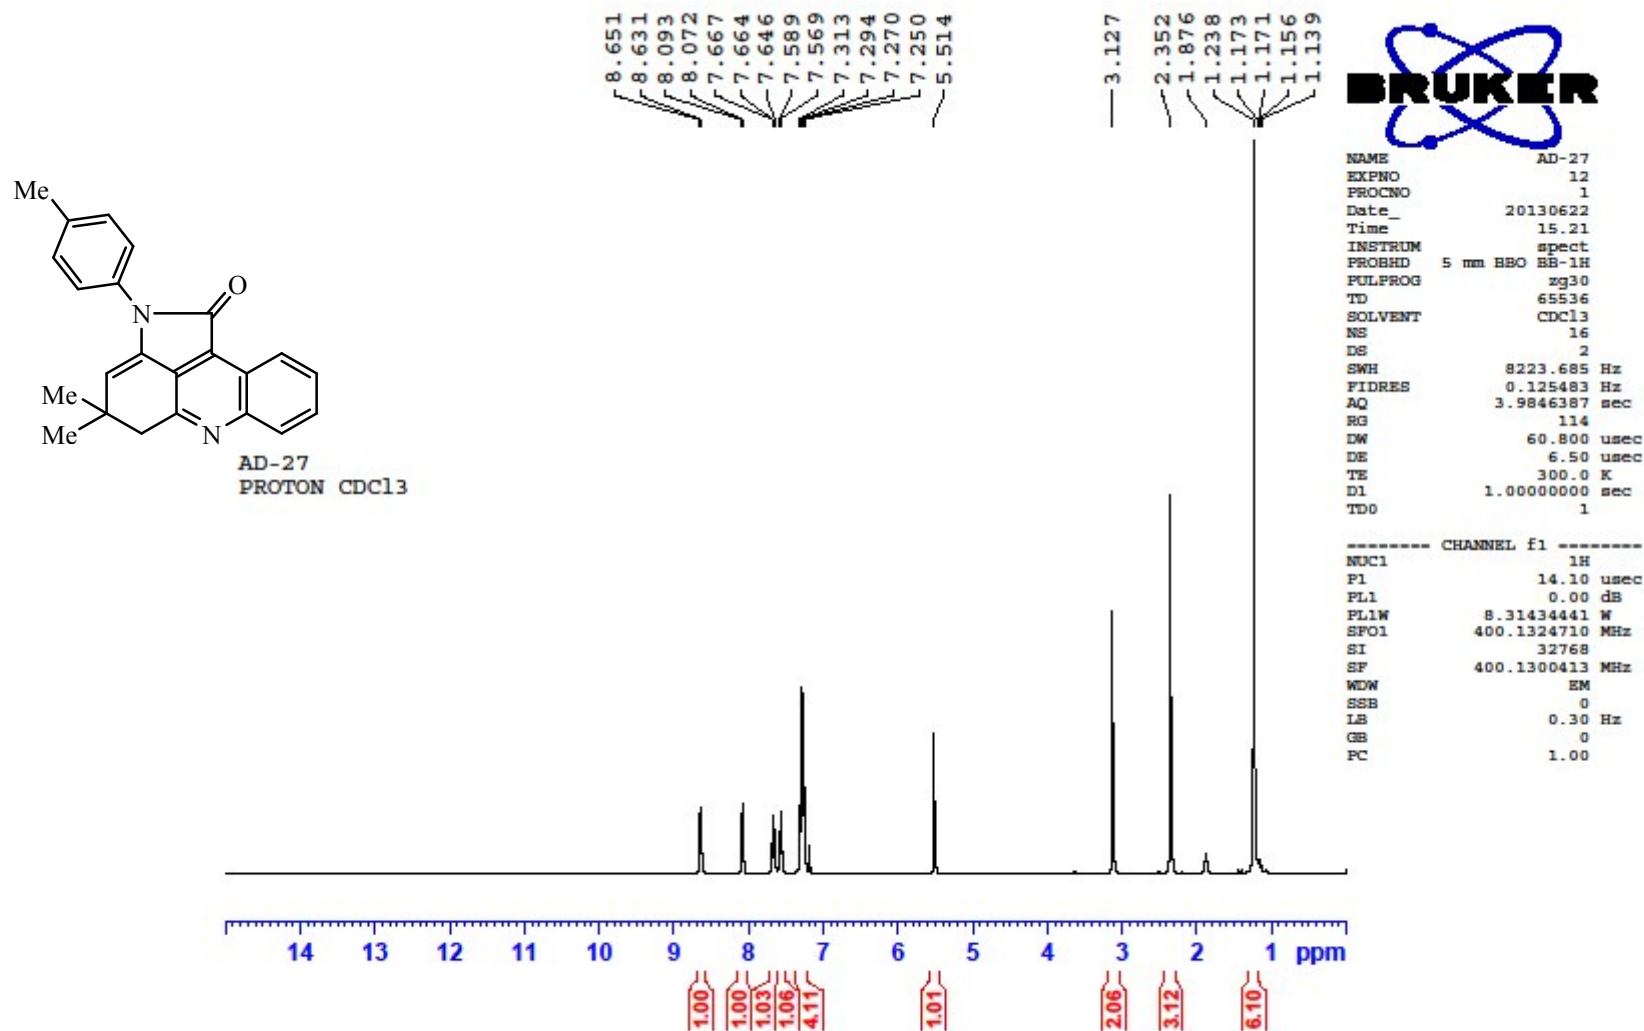 $^1\text{H}$ -NMR of 4,4-Dimethyl-2-*p*-tolyl-4,5-dihydro-2*H*-pyrrolo[2,3,4-*kl*]acridin-1-one (4b)

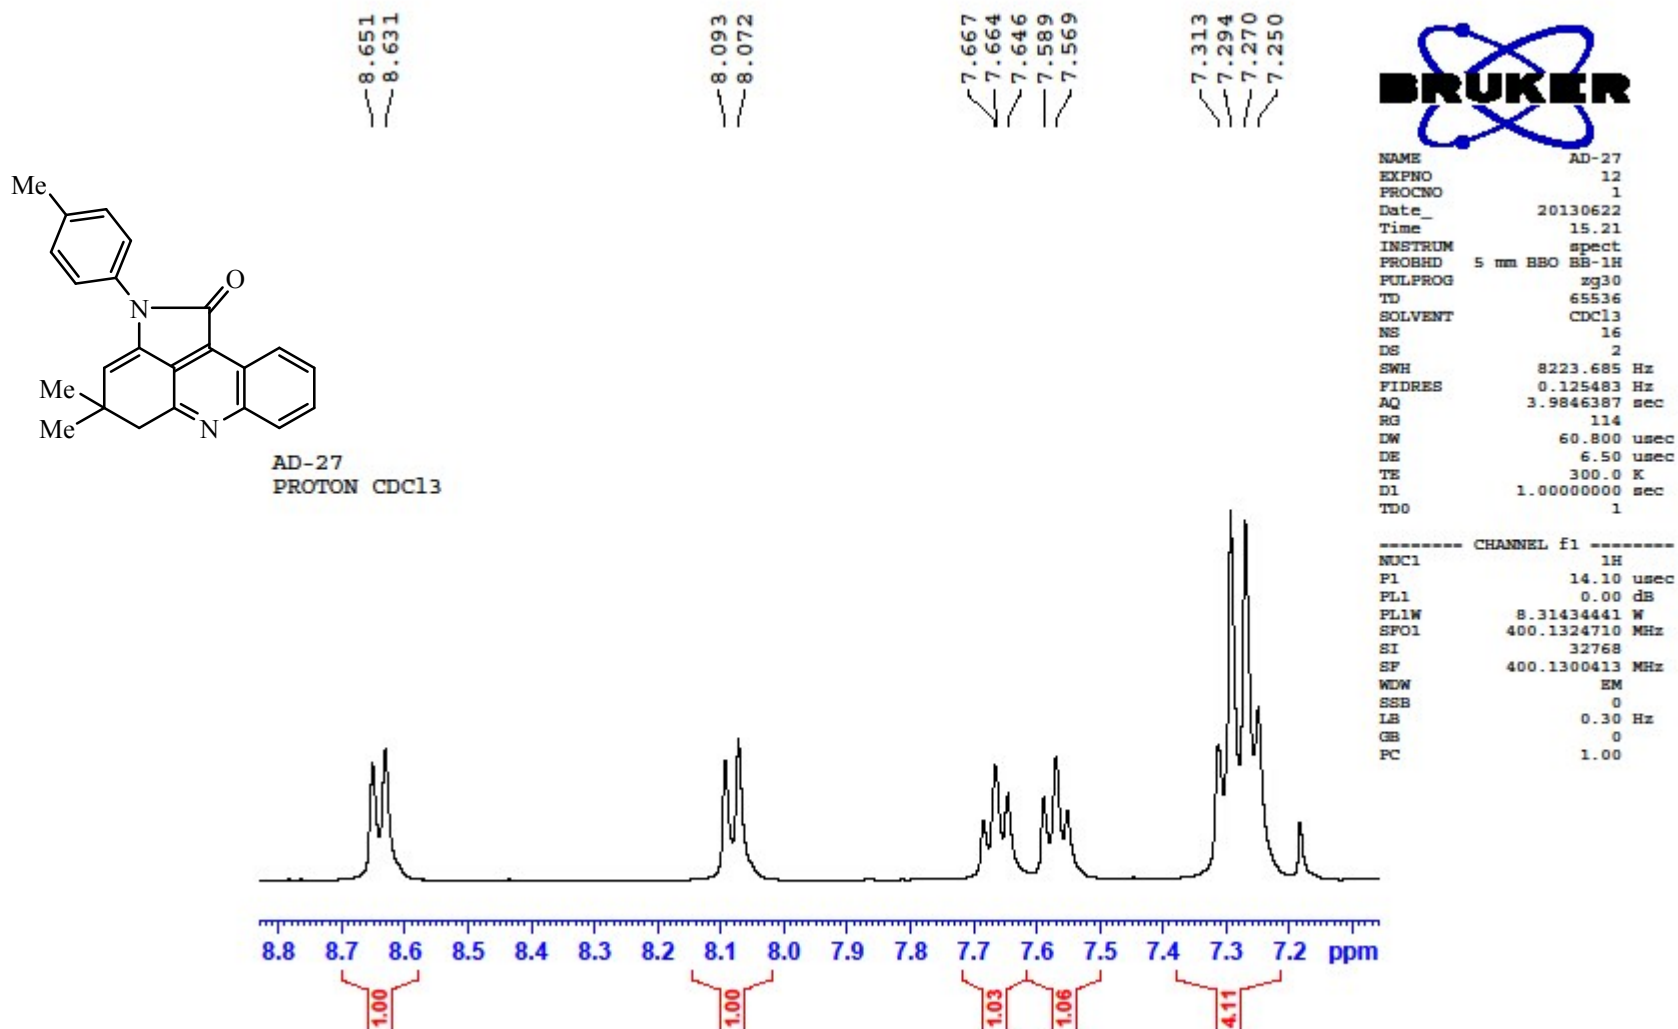

<sup>1</sup>H-NMR of 4,4-Dimethyl-2-*p*-tolyl-4,5-dihydro-2*H*-pyrrolo[2,3,4-*kl*]acridin-1-one (4b)



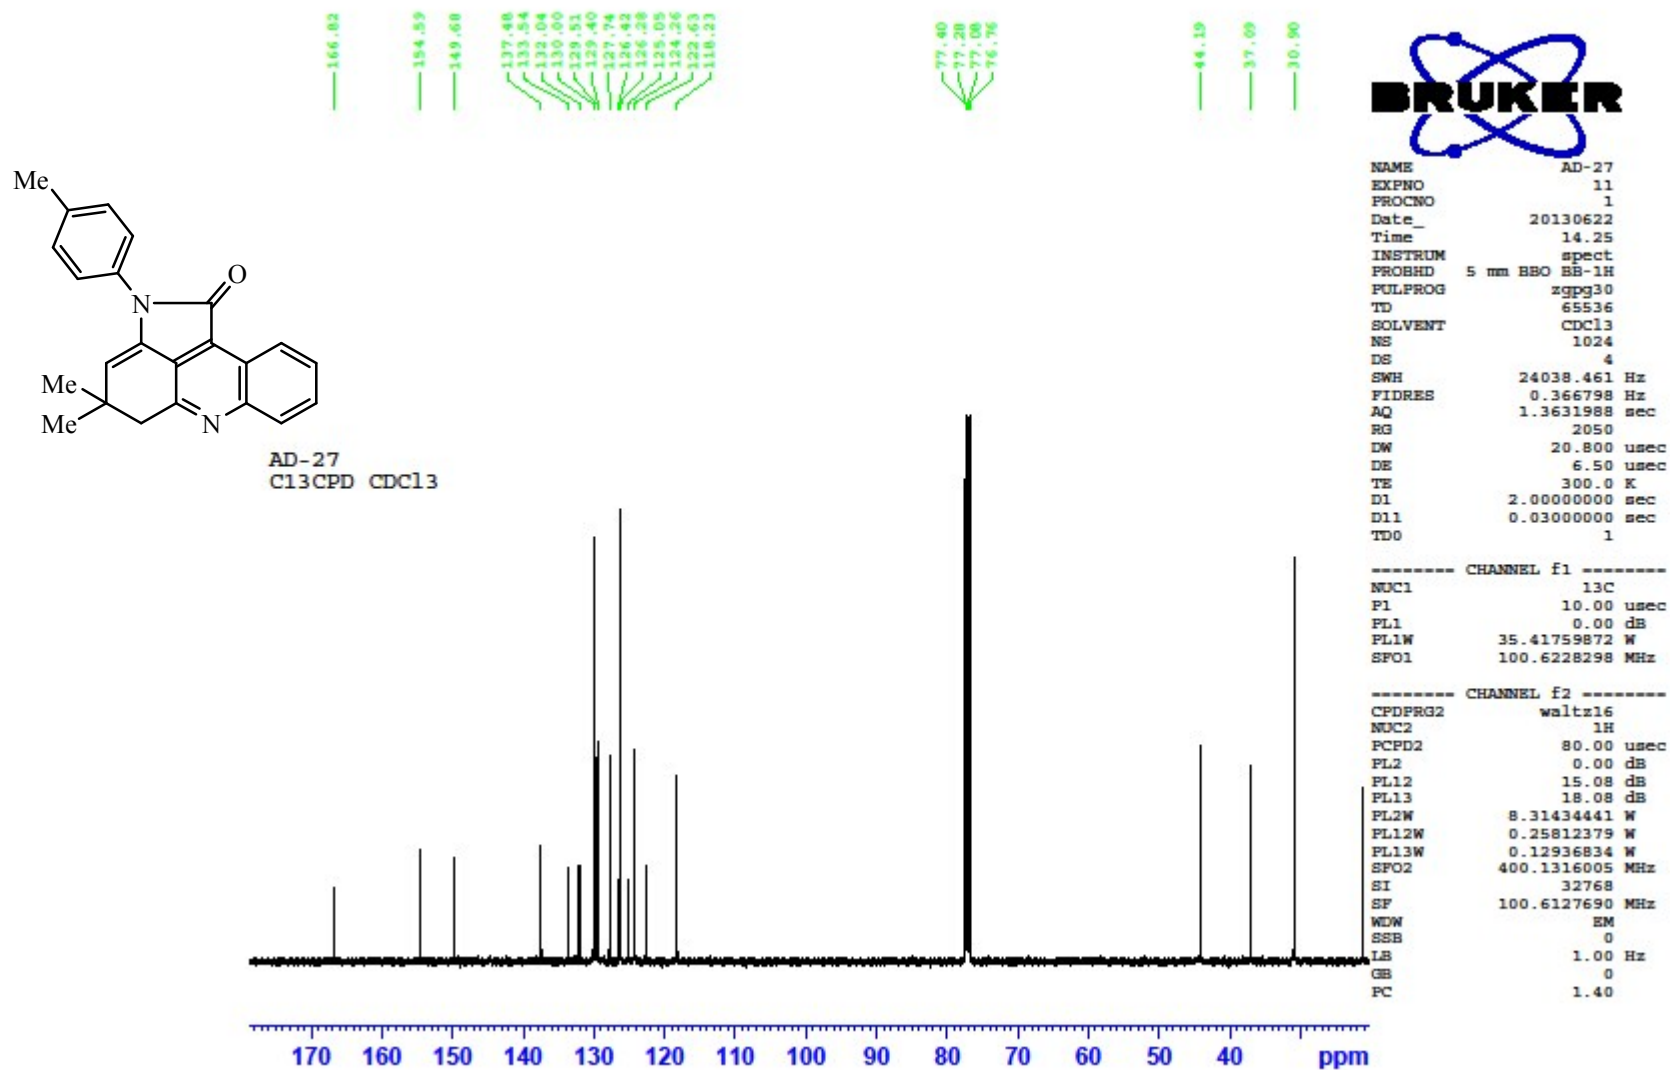 $^{13}\text{C}$ -NMR of 4,4-Dimethyl-2-p-tolyl-4,5-dihydro-2H-pyrrolo[2,3,4-kl]acridin-1-one (4b)

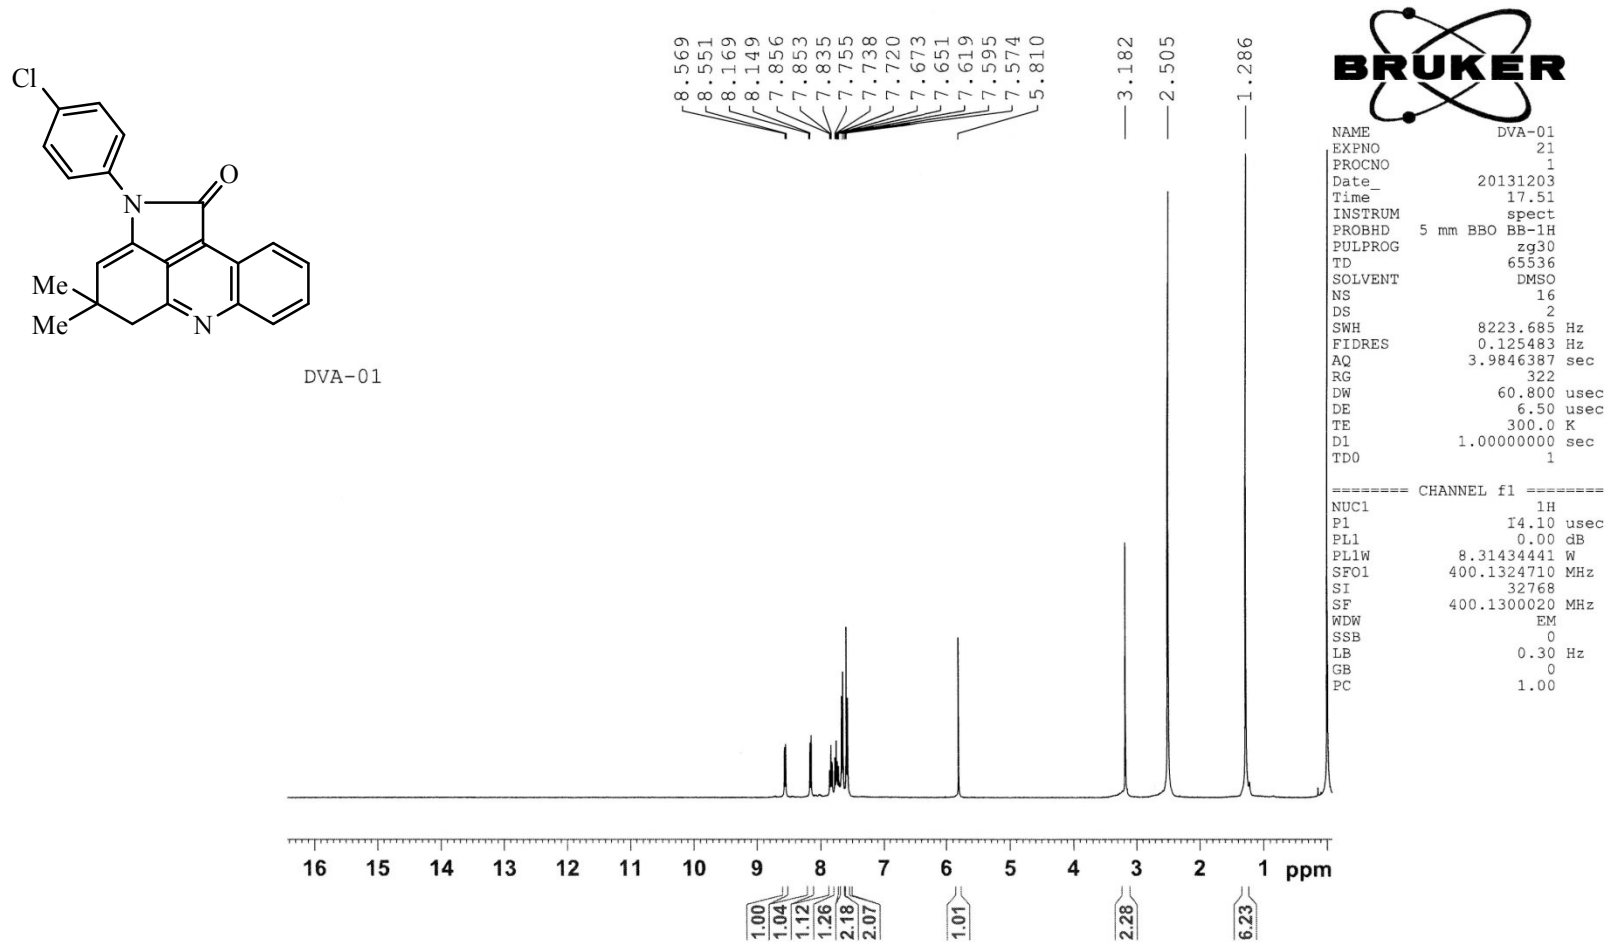

<sup>1</sup>H-NMR of 2-(4-Chlorophenyl)-4,4-dimethyl-4,5-dihydro-2H-pyrrolo[2,3,4-k]acridin-1-one (4c)

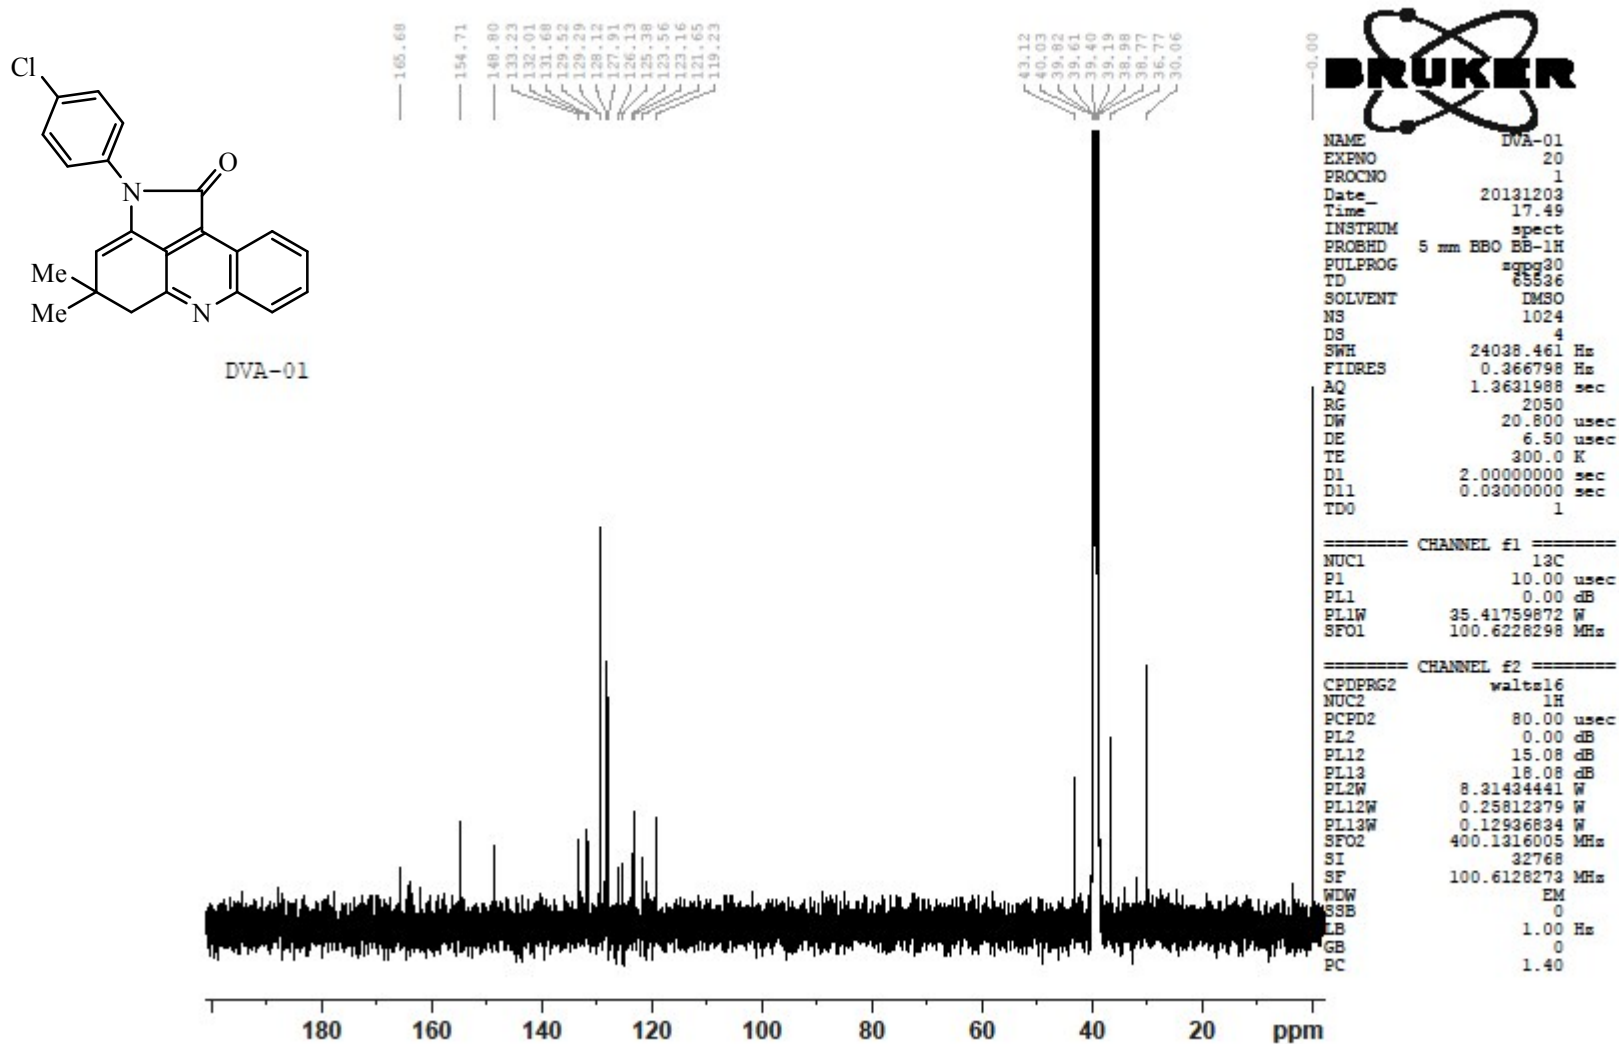

$^{13}\text{C}$ -NMR of 2-(4-Chlorophenyl)-4,4-dimethyl-4,5-dihydro-2H-pyrrolo[2,3,4-kl]acridin-1-one (4c)

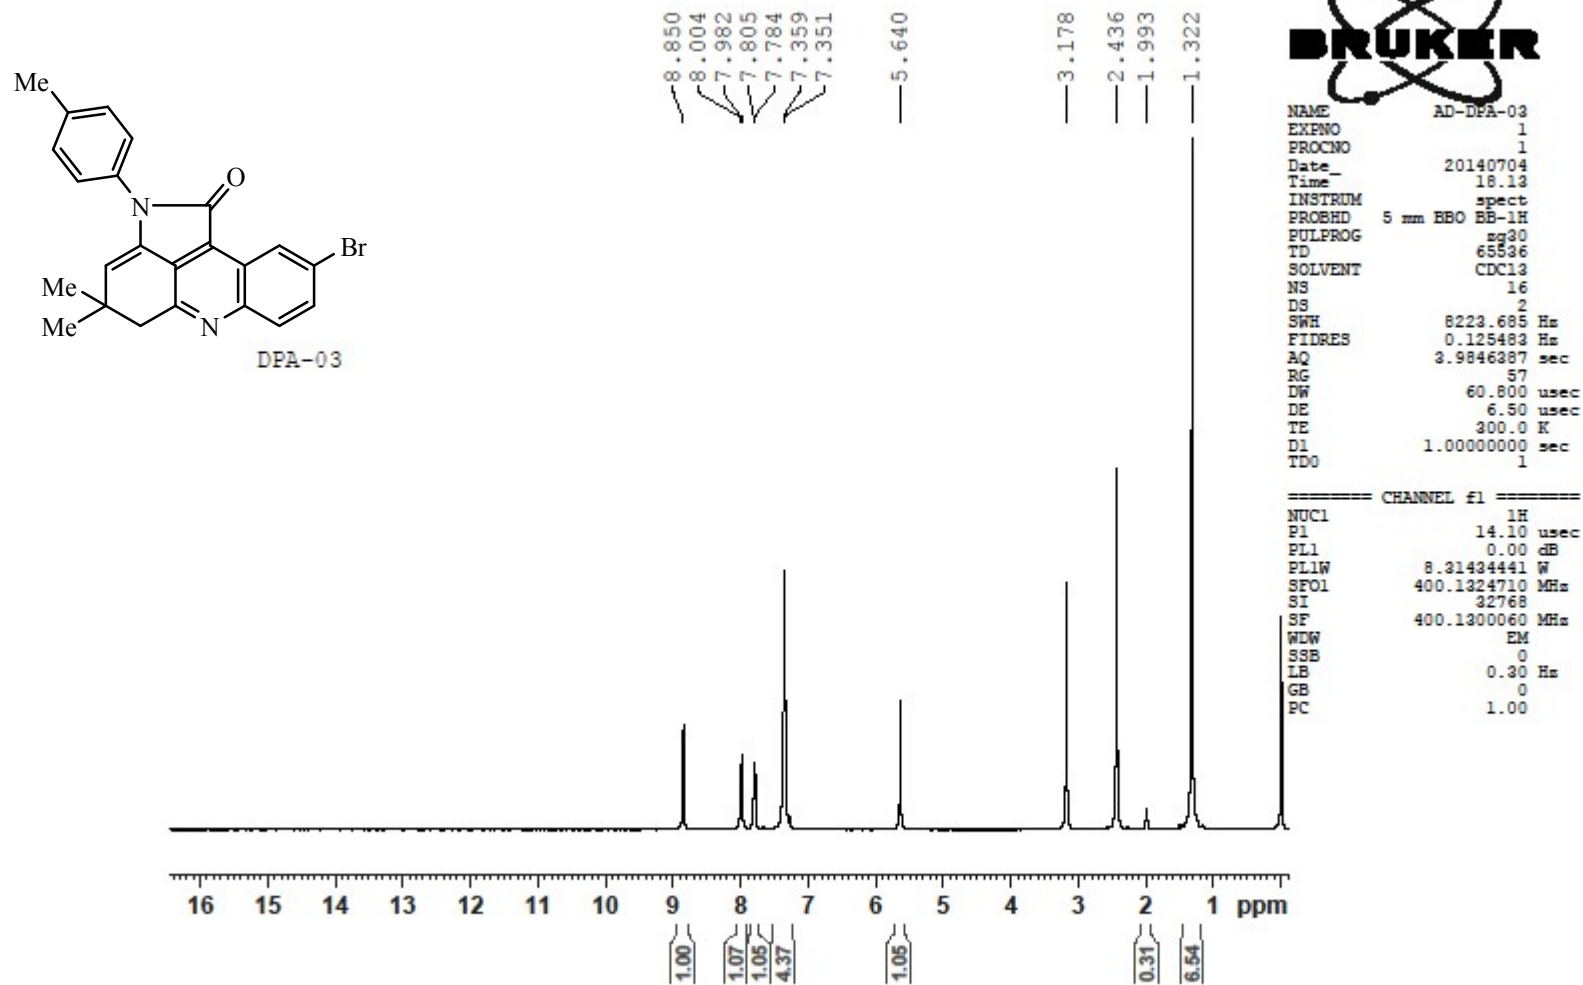

$^1\text{H-NMR}$  of 9-Bromo-4,4-dimethyl-2-*p*-tolyl-4,5-dihydro-2*H*-pyrrolo[2,3,4-*kl*]acridin-1-one (4f)

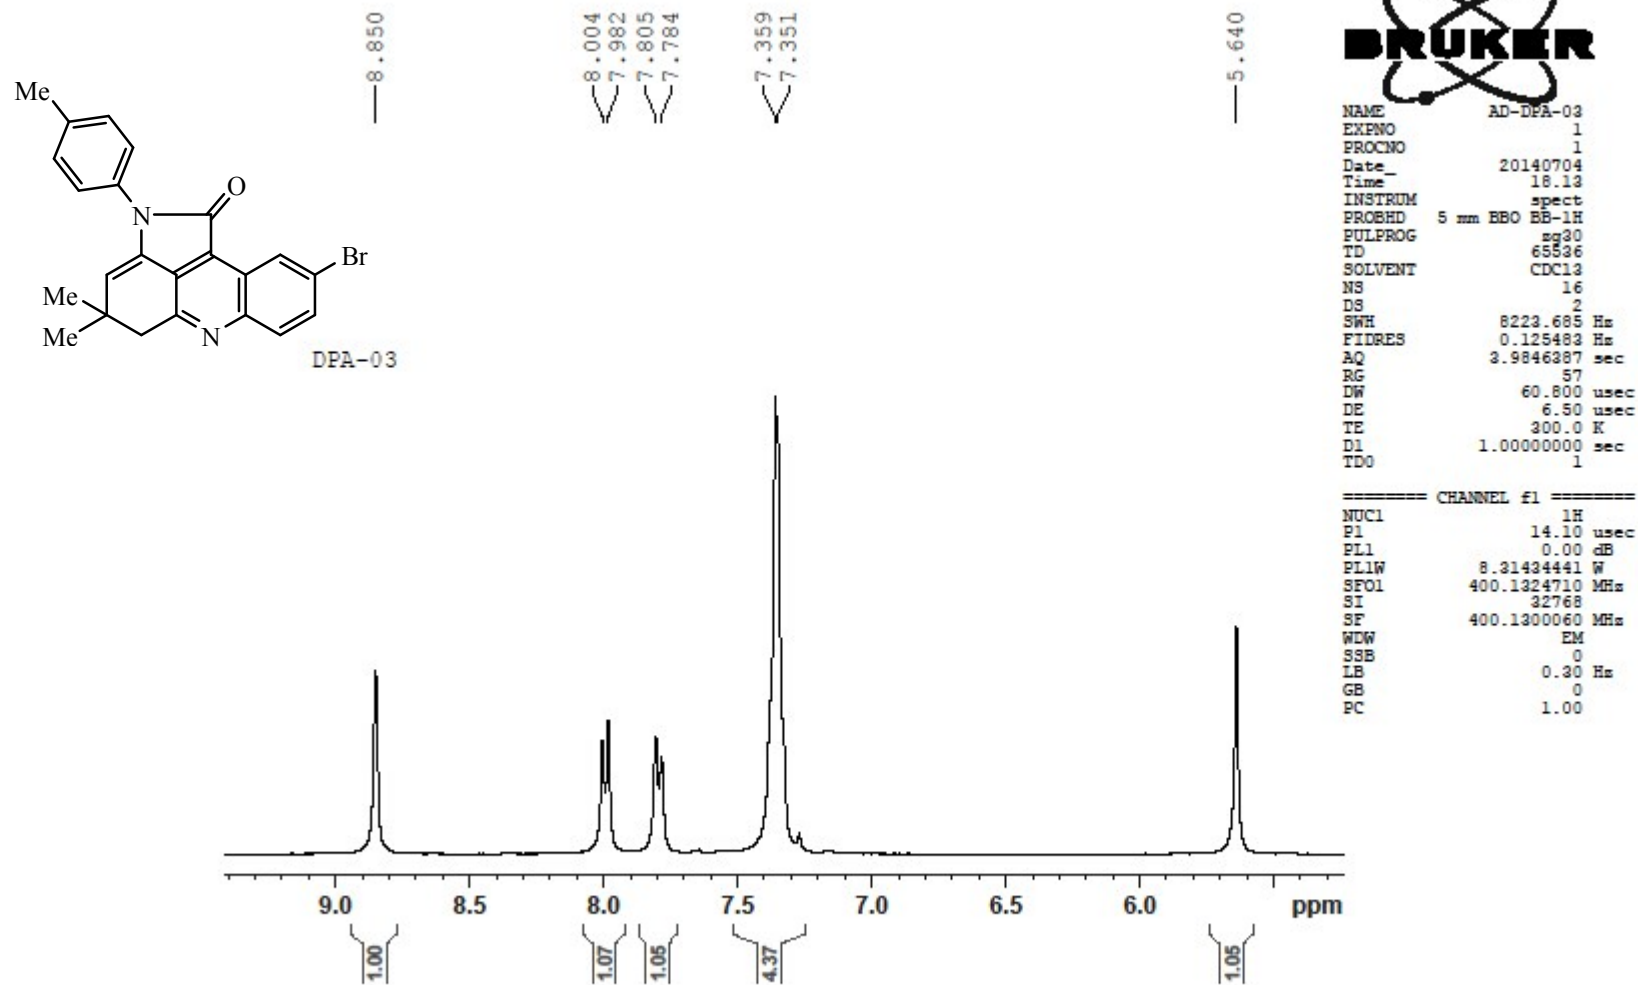<sup>1</sup>H-NMR of 9-Bromo-4,4-dimethyl-2-*p*-tolyl-4,5-dihydro-2*H*-pyrrolo[2,3,4-*kl*]acridin-1-one (4f)

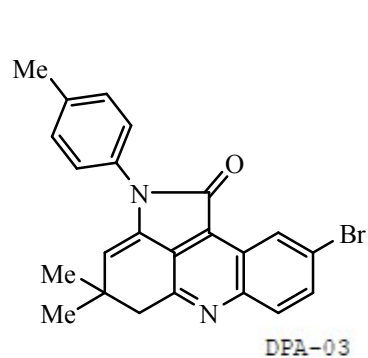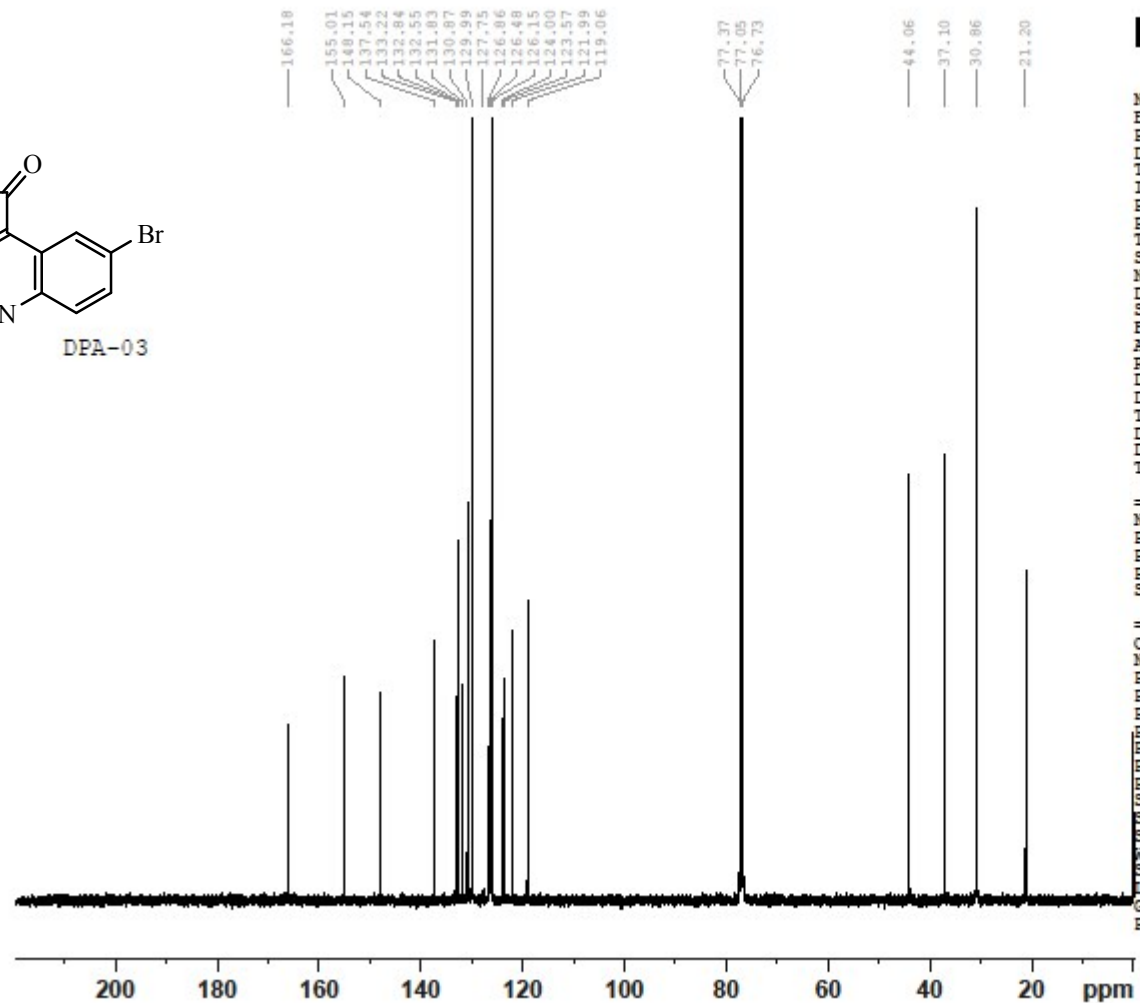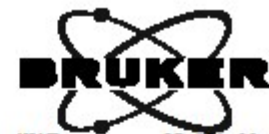

```

NAME      AD-DPA-03
EXPNO     2
PROCNO    1
Date_     20140704
Time_     19.12
INSTRUM   spect
PROBHD    5 mm BBO BB-1H
PULPROG   zgpg30
TD         65536
SOLVENT   CDCl3
NS         1024
DS         4
SWH       24038.461 Hz
FIDRES    0.366798 Hz
AQ         1.3631988 sec
RG         2050
DW         20.800 usec
DE         6.50 usec
TE         300.0 K
D1         2.00000000 sec
D11        0.03000000 sec
TDO        1

```

```

===== CHANNEL f1 =====
NUC1      13C
P1         10.00 usec
PL1        0.00 dB
PL1W       35.41759872 W
SFO1      100.6228298 MHz

```

```

===== CHANNEL f2 =====
CPDPRG2   waltz16
NUC2       1H
PCPD2     80.00 usec
PL2        0.00 dB
PL12       15.08 dB
PL13       18.08 dB
PL2W       8.31434441 W
PL12W      0.25812379 W
PL13W      0.12936834 W
SFO2      400.1316005 MHz
SI         32768
SF         100.6127731 MHz
WDW        EM
SSB         0
LB          1.00 Hz
GB          0
PC          1.40

```

$^{13}\text{C}$ -NMR of 9-Bromo-4,4-dimethyl-2-*p*-tolyl-4,5-dihydro-2*H*-pyrrolo[2,3,4-*kl*]acridin-1-one (4f)

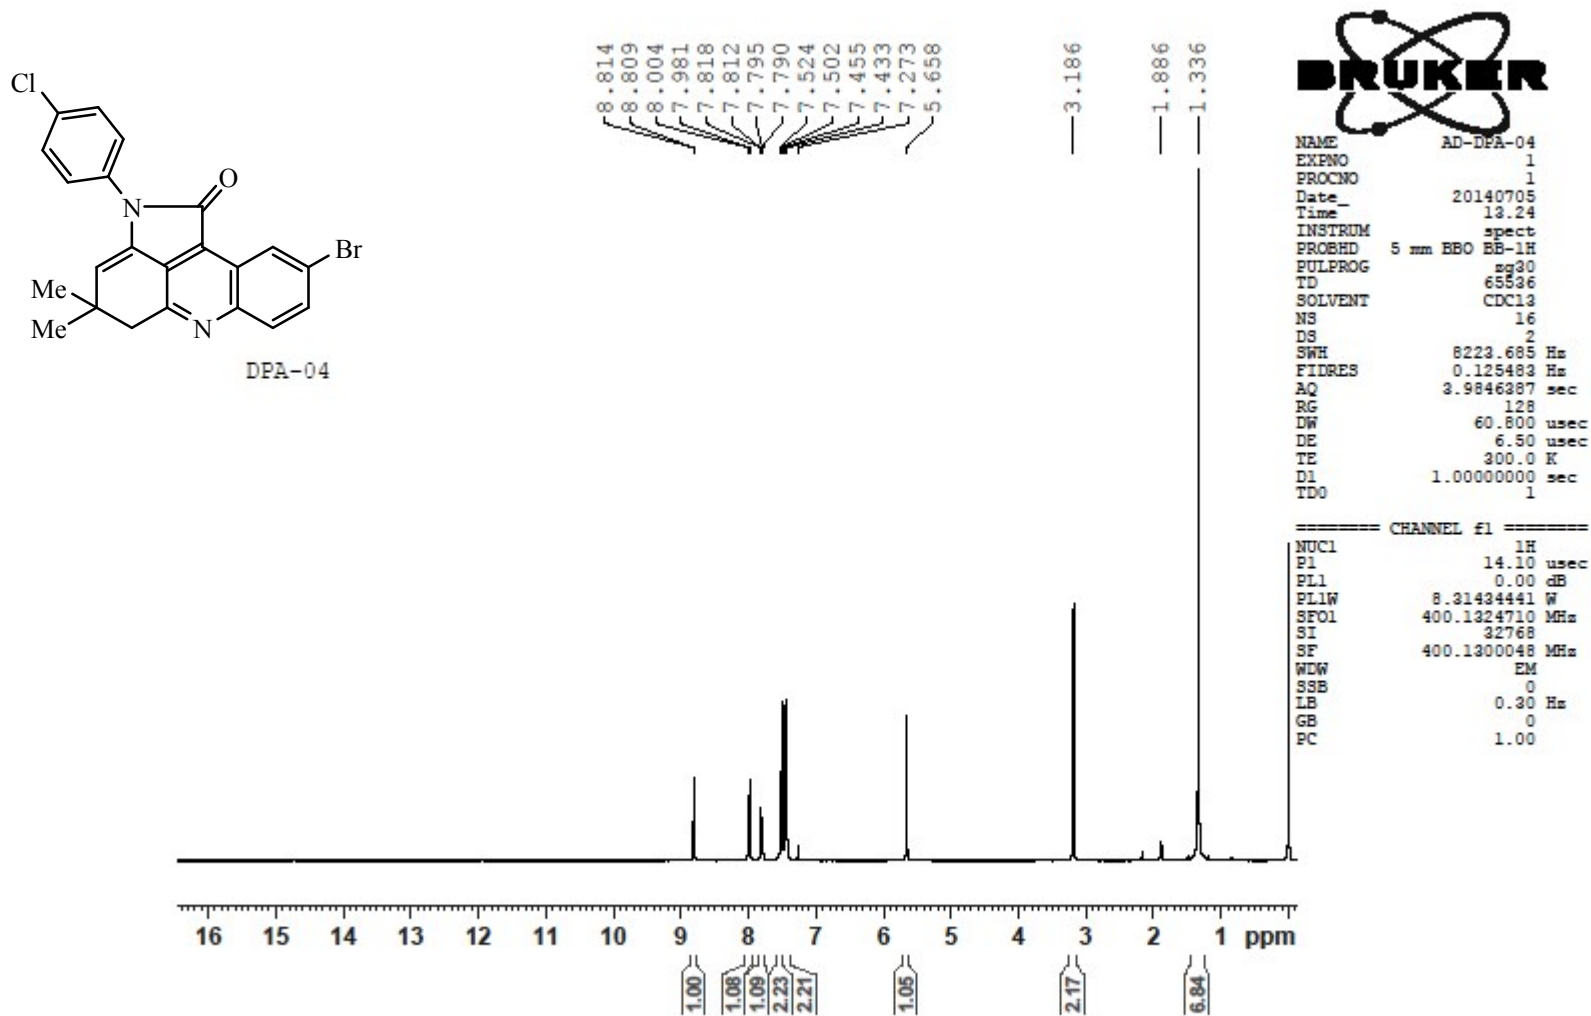

<sup>1</sup>H-NMR of 9-Bromo-2-(4-chlorophenyl)-4,4-dimethyl-4,5-dihydro-2H-pyrrolo[2,3,4-*kl*]acridin-1-one (4g)

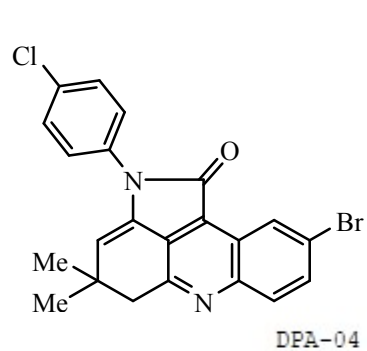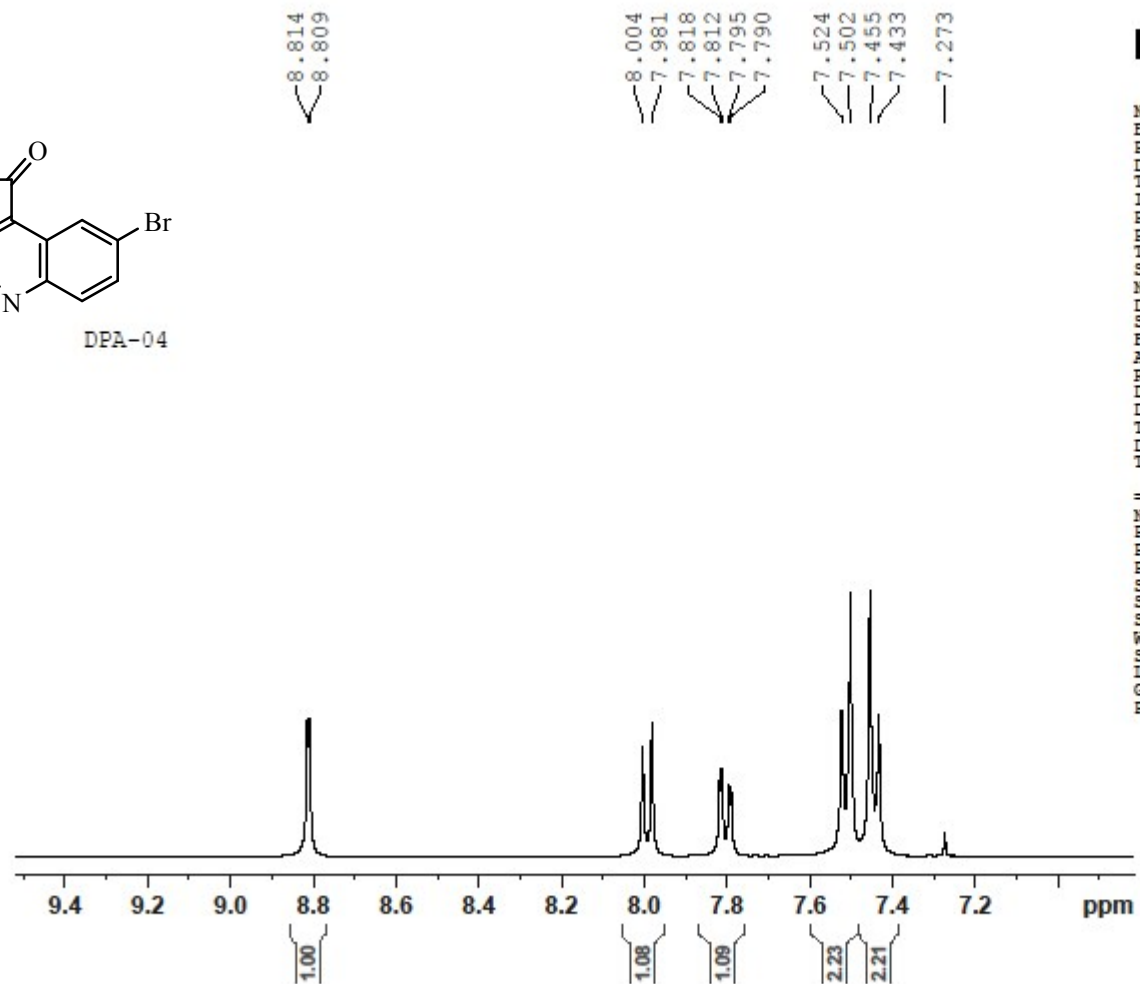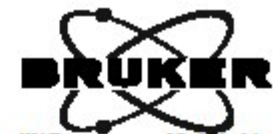

```

NAME      AD-DPA-04
EXPNO     1
PROCNO    1
Date_     20140705
Time      13.24
INSTRUM   spect
PROBHD    5 mm BBO BB-1H
PULPROG   zg30
TD         65536
SOLVENT   CDCl3
NS         16
DS         2
SWH       8223.685 Hz
FIDRES    0.125483 Hz
AQ         3.9846387 sec
RG         128
DW         60.800 usec
DE         6.50 usec
TE         300.0 K
D1         1.00000000 sec
TDO        1
  
```

```

===== CHANNEL f1 =====
NUC1      1H
P1         14.10 usec
PL1        0.00 dB
PL1W      8.31434441 W
SFO1      400.1324710 MHz
SI         32768
SF         400.1300048 MHz
WDW        EM
SSB        0
LB         0.30 Hz
GB         0
PC         1.00
  
```

<sup>1</sup>H-NMR of 9-Bromo-2-(4-chlorophenyl)-4,4-dimethyl-4,5-dihydro-2H-pyrrolo[2,3,4-kl]acridin-1-one (4g)



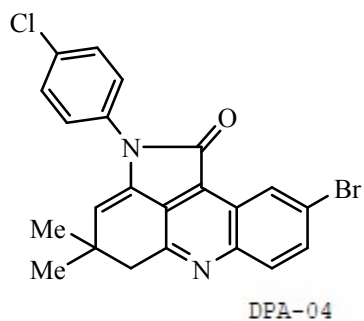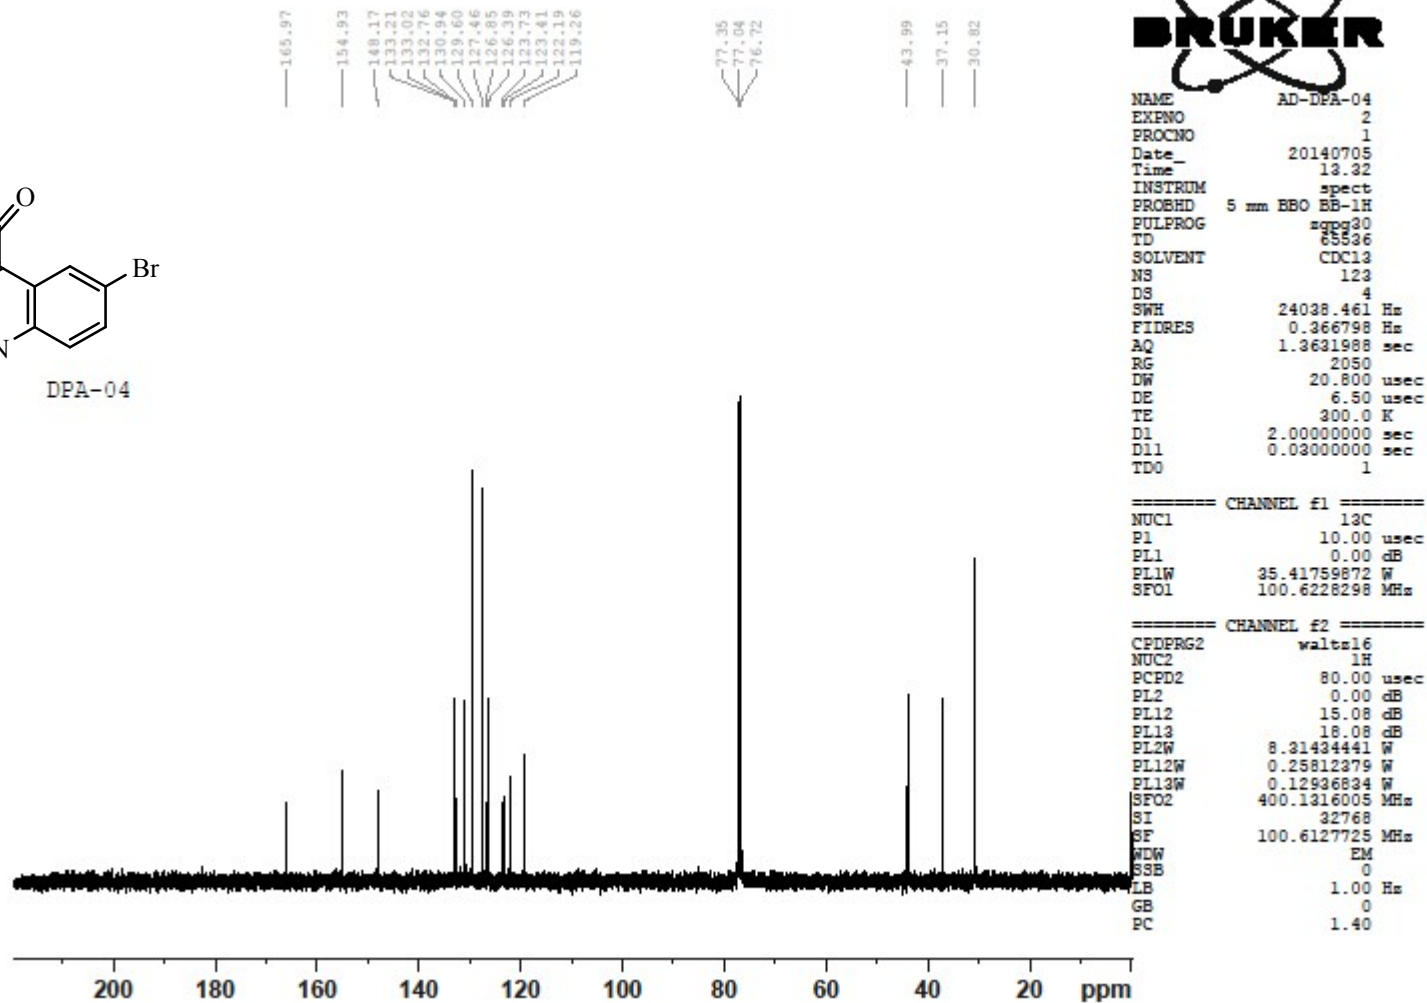

<sup>13</sup>C-NMR of 9-Bromo-2-(4-chlorophenyl)-4,4-dimethyl-4,5-dihydro-2H-pyrrolo[2,3,4-kl]acridin-1-one (4g)

## NATIONAL FACILITY FOR DRUG DISCOVERY CENTR

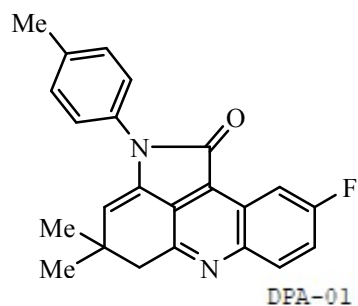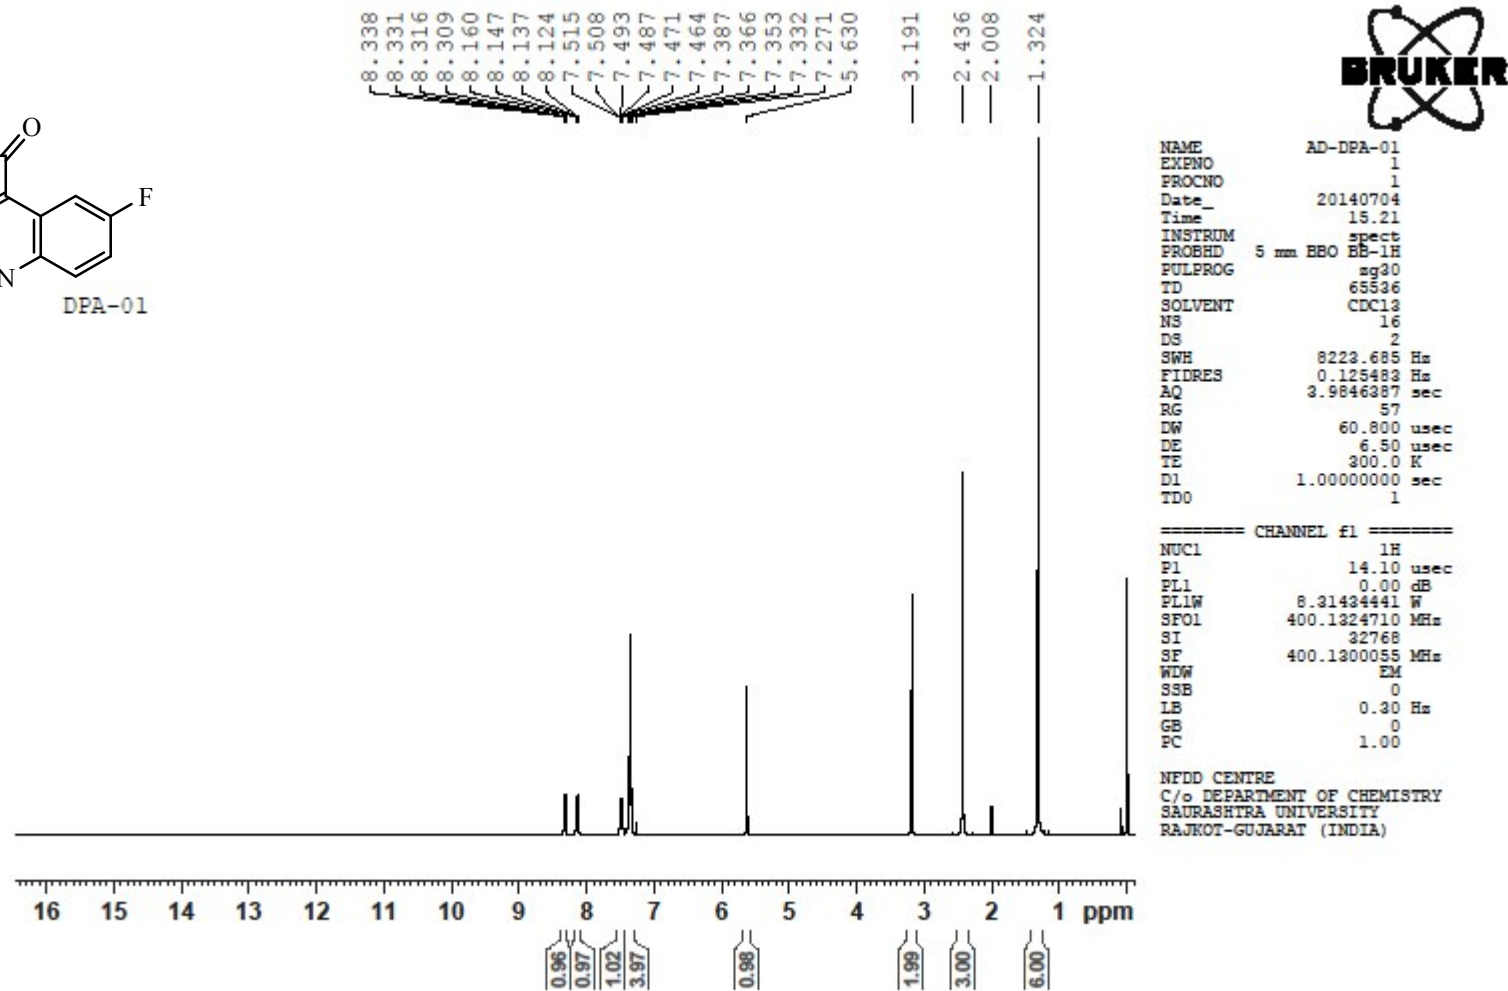<sup>1</sup>H-NMR of 9-Fluoro-4,4-dimethyl-2-*p*-tolyl-4,5-dihydro-2*H*-pyrrolo[2,3,4-*kl*]acridin-1-one (4j)

## NATIONAL FACILITY FOR DRUG DISCOVERY CENTR

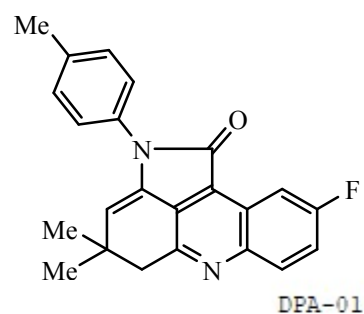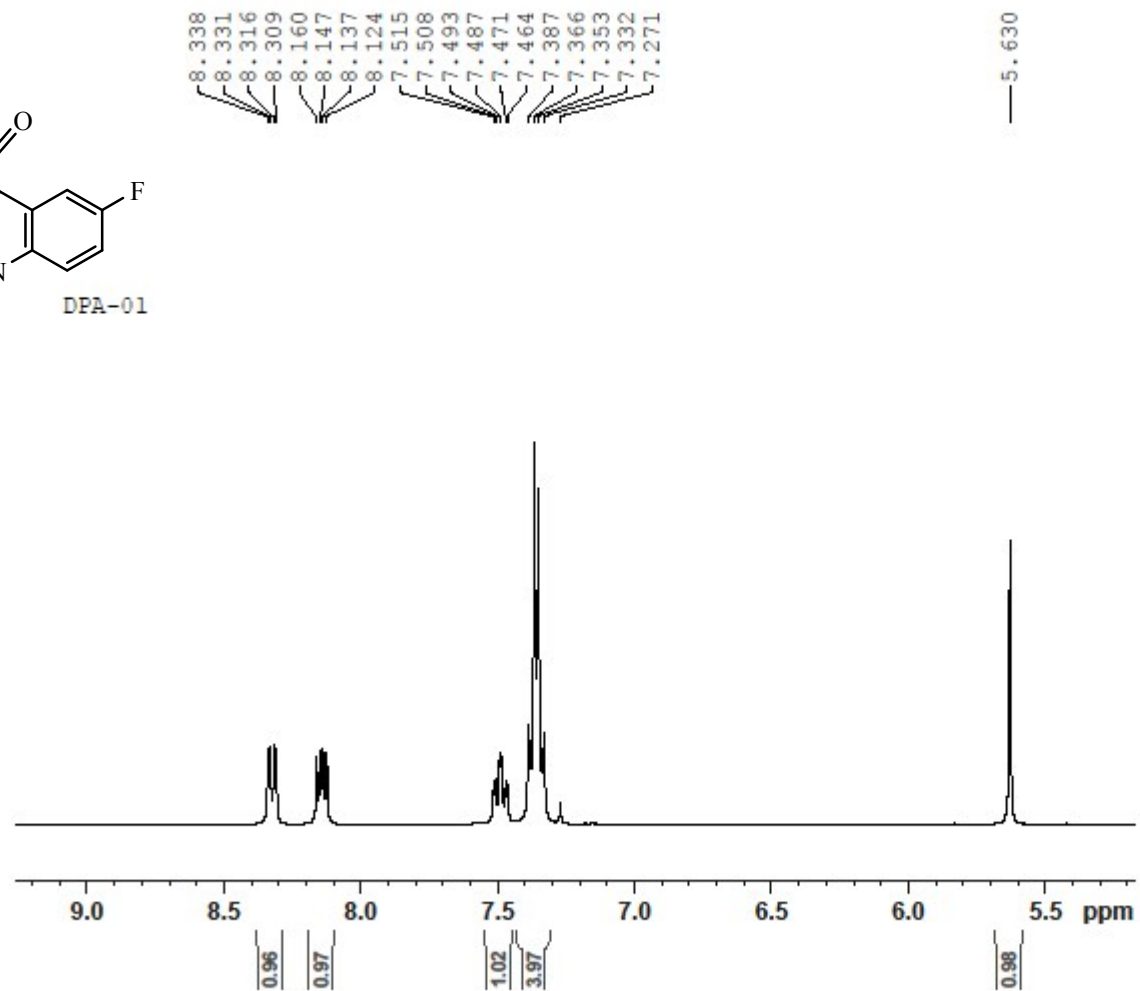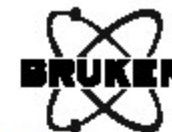

```

NAME          AD-DPA-01
EXPNO         1
PROCNO        1
Date_         20140704
Time          15.21
INSTRUM       spect
PROBHD        5 mm BBO BB-1H
PULPROG       zg30
TD            65536
SOLVENT       CDCl3
NS            16
DS            2
SWH           8223.685 Hz
FIDRES        0.125482 Hz
AQ            3.9846387 sec
RG            57
DW            60.800 usec
DE            6.50 usec
TE            300.0 K
D1            1.00000000 sec
TDO           1

```

```

===== CHANNEL f1 =====
NUC1           1H
P1             14.10 usec
PL1            0.00 dB
PL1W           8.31434441 W
SFO1           400.1324710 MHz
SI             32768
SF             400.1300055 MHz
WDW            EM
SSB            0
LB             0.30 Hz
GB             0
PC             1.00

```

NFDD CENTRE  
C/o DEPARTMENT OF CHEMISTRY  
SAURASHTRA UNIVERSITY  
RAJKOT-GUJARAT (INDIA)

$^1\text{H-NMR}$  of 9-Fluoro-4,4-dimethyl-2-*p*-tolyl-4,5-dihydro-2*H*-pyrrolo[2,3,4-*kl*]acridin-1-one (4j)

## NATIONAL FACILITY FOR DRUG DISCOVERY CENTR

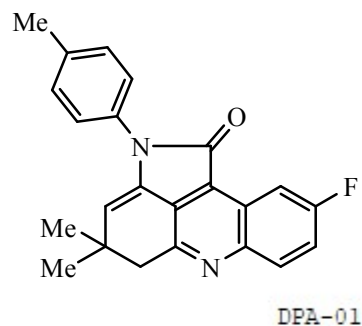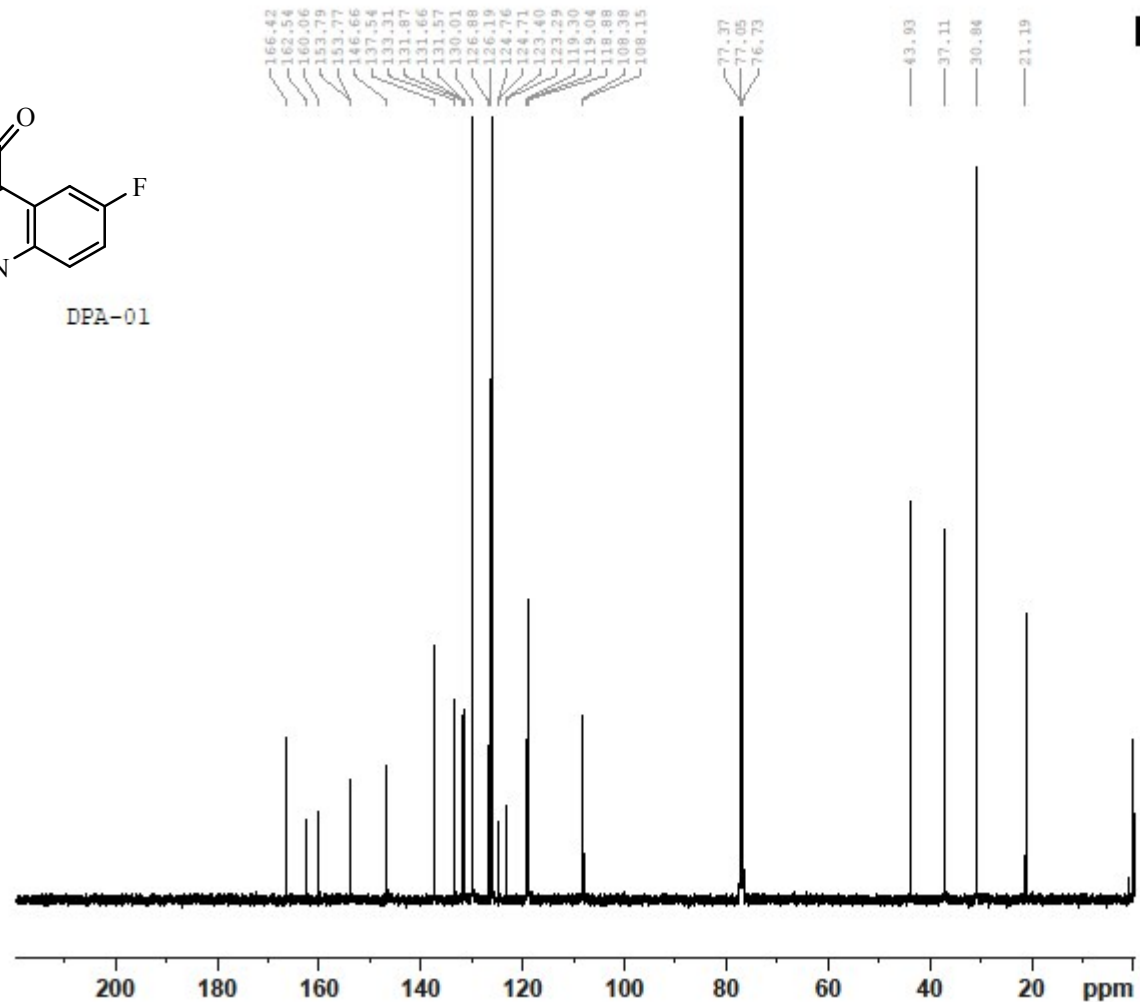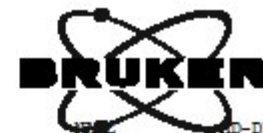

```

=====
NAME          DPA-01
EXPNO         2
PROCNO        1
Date_         20140704
Time          16.20
INSTRUM       spect
PROBHD        5 mm BBO BB-1H
PULPROG       zgpg30
TD            65536
SOLVENT       CDCl3
NS            1024
DS            4
SWH           24038.461 Hz
FIDRES        0.366798 Hz
AQ            1.3631988 sec
RG            2050
DW            20.800 usec
DE            6.50 usec
TE            300.0 K
D1            2.00000000 sec
D11           0.03000000 sec
TDO           1
=====

```

```

===== CHANNEL #1 =====
NUC1          13C
P1            10.00 usec
PL1           0.00 dB
PL1W          35.41759872 W
SFO1          100.6226298 MHz
=====

```

```

===== CHANNEL #2 =====
CPDPRG2       waltz16
NUC2          1H
PCPD2         80.00 usec
PL2           0.00 dB
PL12          15.08 dB
PL13          18.08 dB
PL2W          8.31434441 W
PL12W         0.25812379 W
PL13W         0.12936834 W
SFO2          400.1316005 MHz
SI            32768
SF            100.6127717 MHz
WDW           EM
SSB           0
LB            1.00 Hz
GB            0
PC            1.40
=====

```

NFFD CENTRE  
 C/o DEPARTMENT OF CHEMISTRY  
 SAURASHTRA UNIVERSITY  
 RAJKOT-GUJARAT (INDIA)

$^{13}\text{C}$ -NMR of 9-Fluoro-4,4-dimethyl-2-p-tolyl-4,5-dihydro-2H-pyrrolo[2,3,4-k]acridin-1-one (4j)

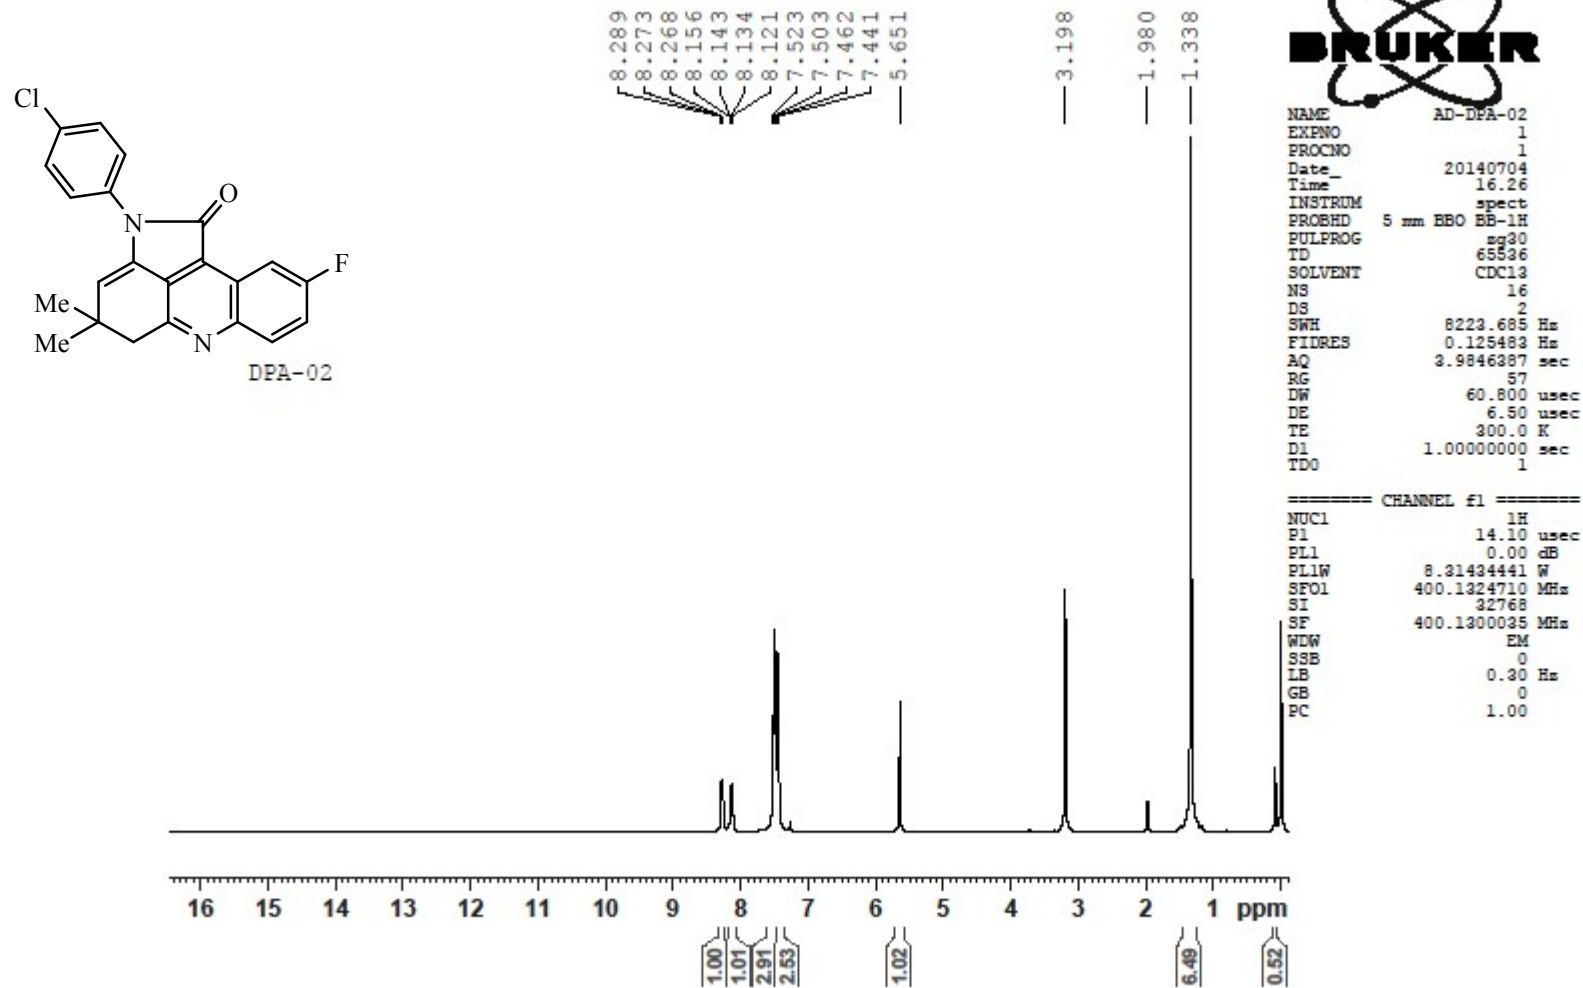

<sup>1</sup>H-NMR of 2-(4-Chlorophenyl)-9-fluoro-4,4-dimethyl-4,5-dihydro-2H-pyrrolo[2,3,4-*kl*]acridin-1-one (4k)

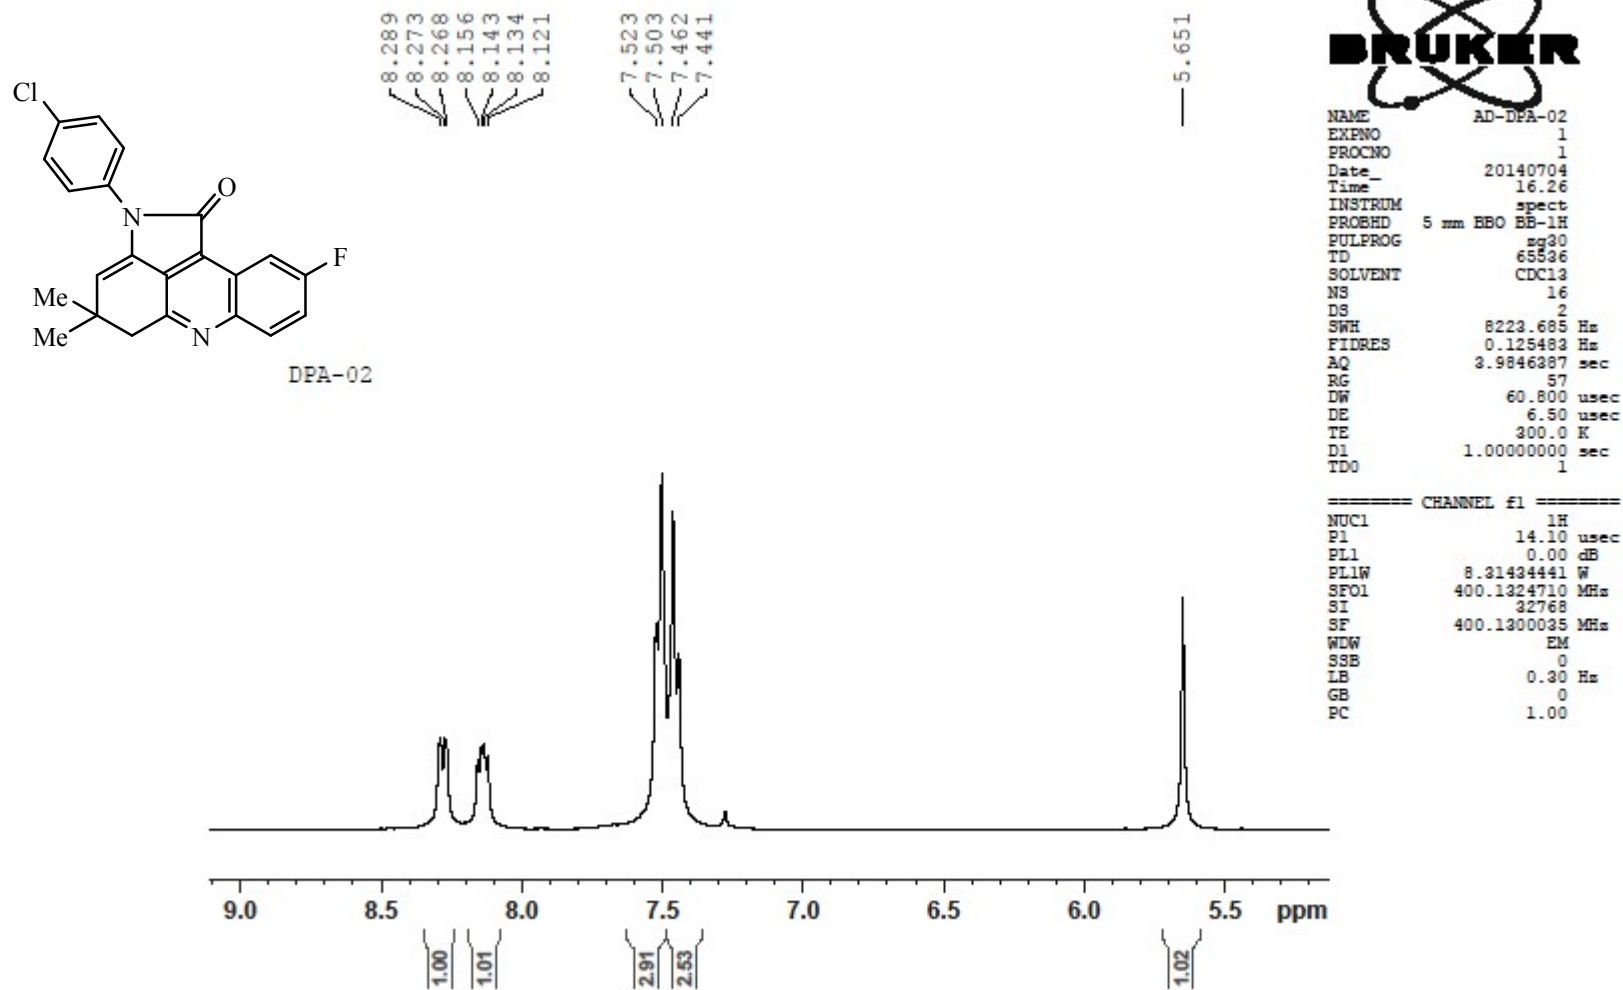

<sup>1</sup>H-NMR of 2-(4-Chlorophenyl)-9-fluoro-4,4-dimethyl-4,5-dihydro-2H-pyrrolo[2,3,4-*kl*]acridin-1-one (4k)

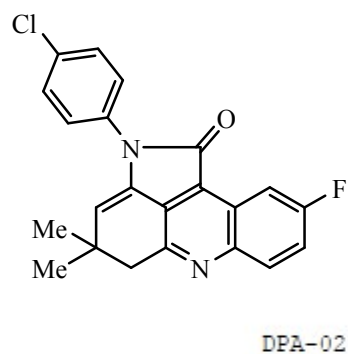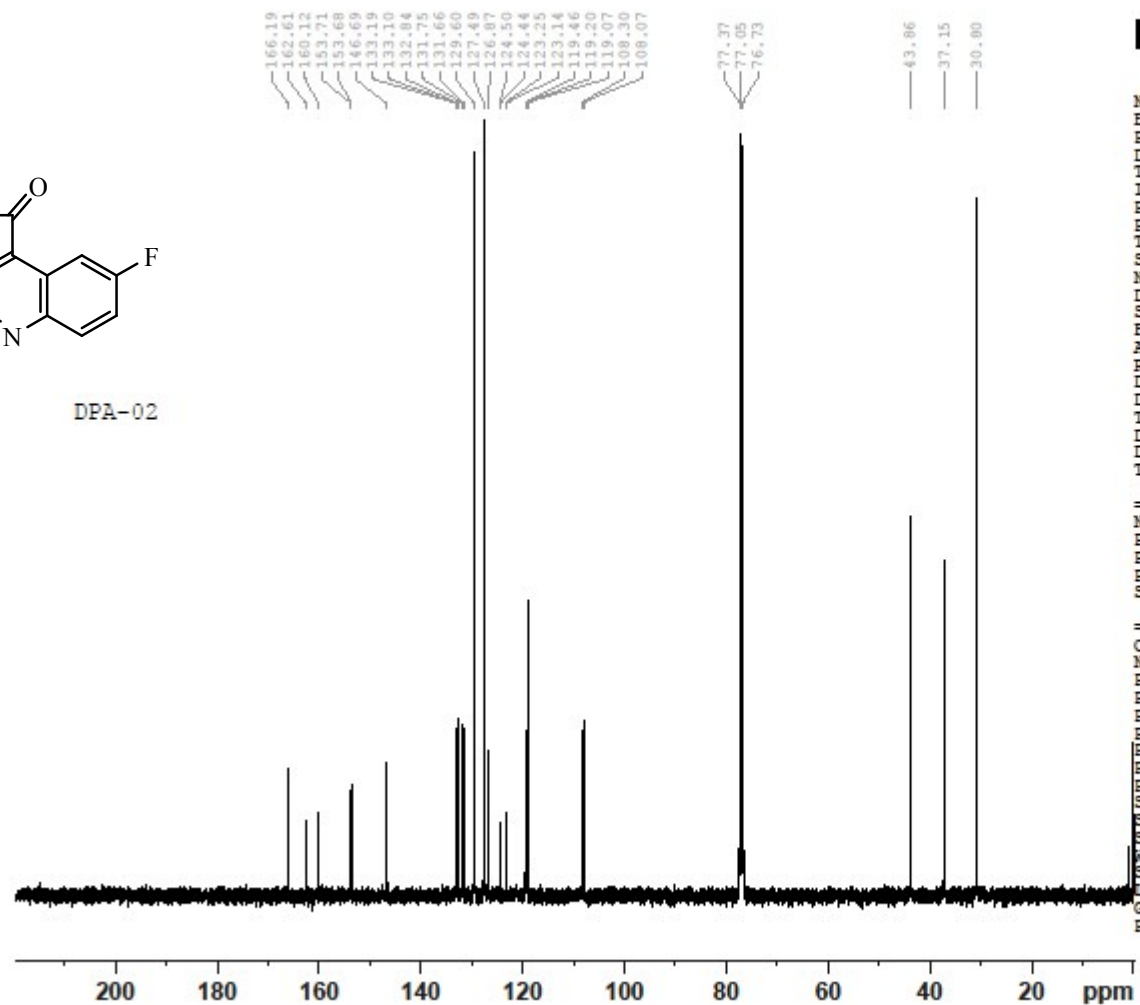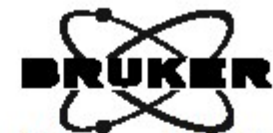

```

NAME      AD-DPA-02
EXPNO     2
PROCNO    1
Date_     20140704
Time      16.49
INSTRUM   spect
PROBHD    5 mm BBO BB-1H
PULPROG   zgpg30
TD        65536
SOLVENT   CDCl3
NS        516
DS        4
SWH       24038.461 Hz
FIDRES    0.366798 Hz
AQ        1.3631988 sec
RG        2050
DW        20.800 usec
DE        6.50 usec
TE        300.0 K
D1        2.00000000 sec
D11       0.03000000 sec
TDO       1

```

```

===== CHANNEL f1 =====
NUC1      13C
P1        10.00 usec
PL1       0.00 dB
PL1W      35.41759872 W
SFO1      100.6228298 MHz

```

```

===== CHANNEL f2 =====
CPDPRG2   waltz16
NUC2      1H
PCPD2     80.00 usec
PL2       0.00 dB
PL12      15.08 dB
PL13      18.08 dB
PL2W      8.31434441 W
PL12W     0.25812379 W
PL13W     0.12936834 W
SFO2      400.1316005 MHz
SI        32768
SF        100.6127713 MHz
WDW       EM
SSB       0
LB        1.00 Hz
GB        0
PC        1.40

```

$^{13}\text{C}$ -NMR of 2-(4-Chlorophenyl)-9-fluoro-4,4-dimethyl-4,5-dihydro-2H-pyrrolo[2,3,4-k]acridin-1-one (4k)



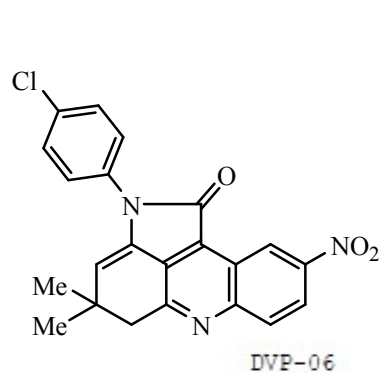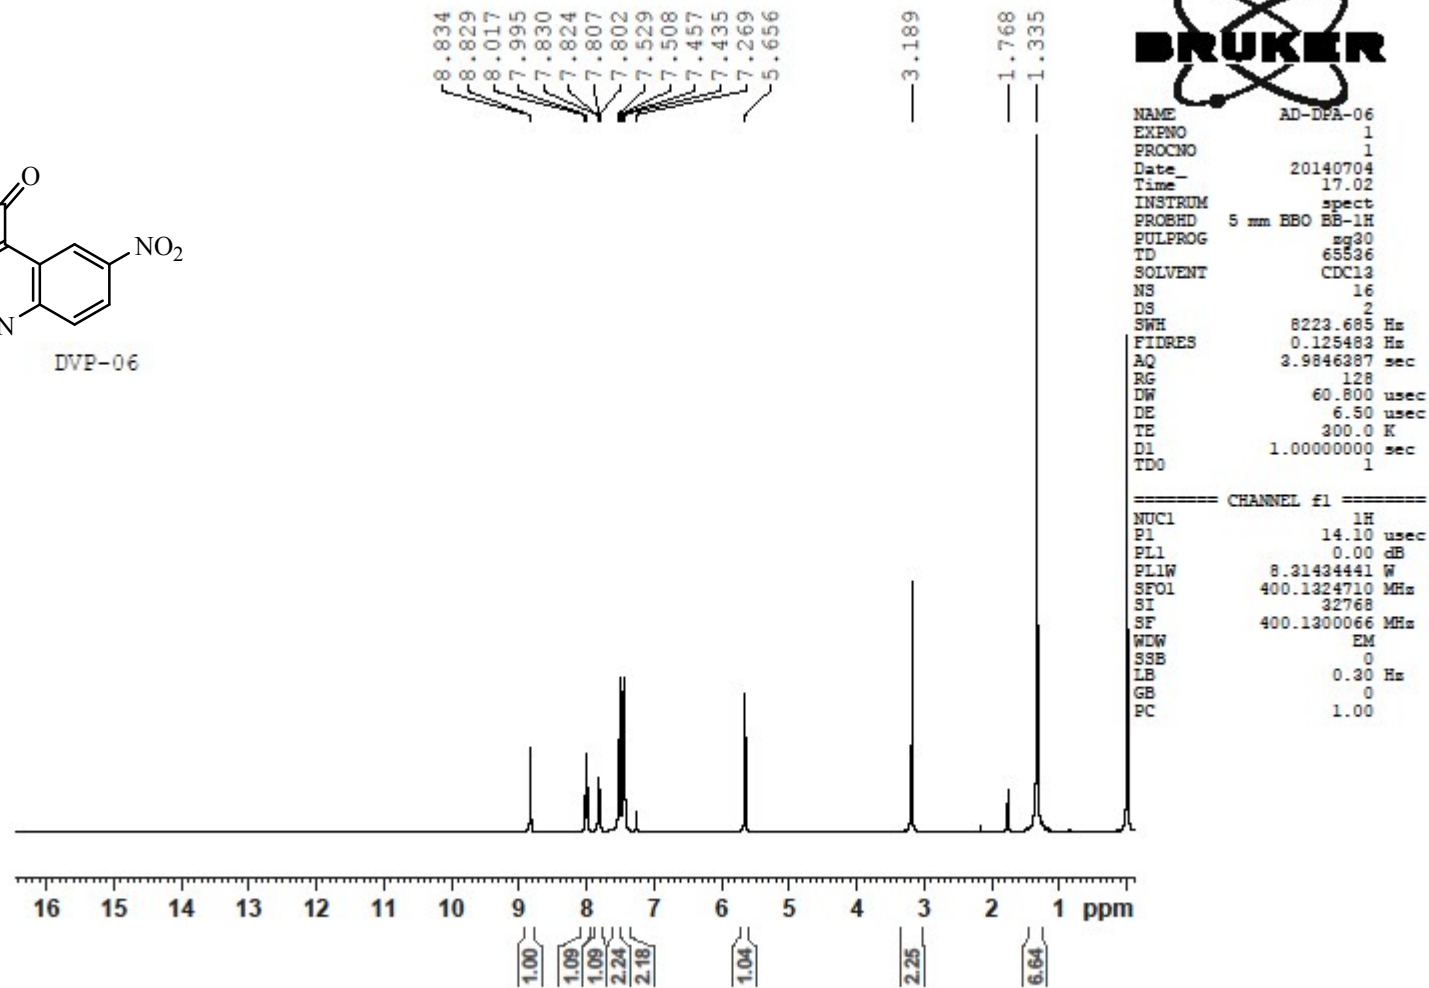

<sup>1</sup>H-NMR of 2-(4-Chlorophenyl)-4,4-dimethyl-9-nitro-4,5-dihydro-2H-pyrrolo[2,3,4-k]acridin-1-one (4n)



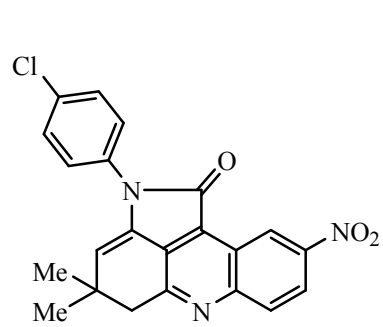

DVP-06

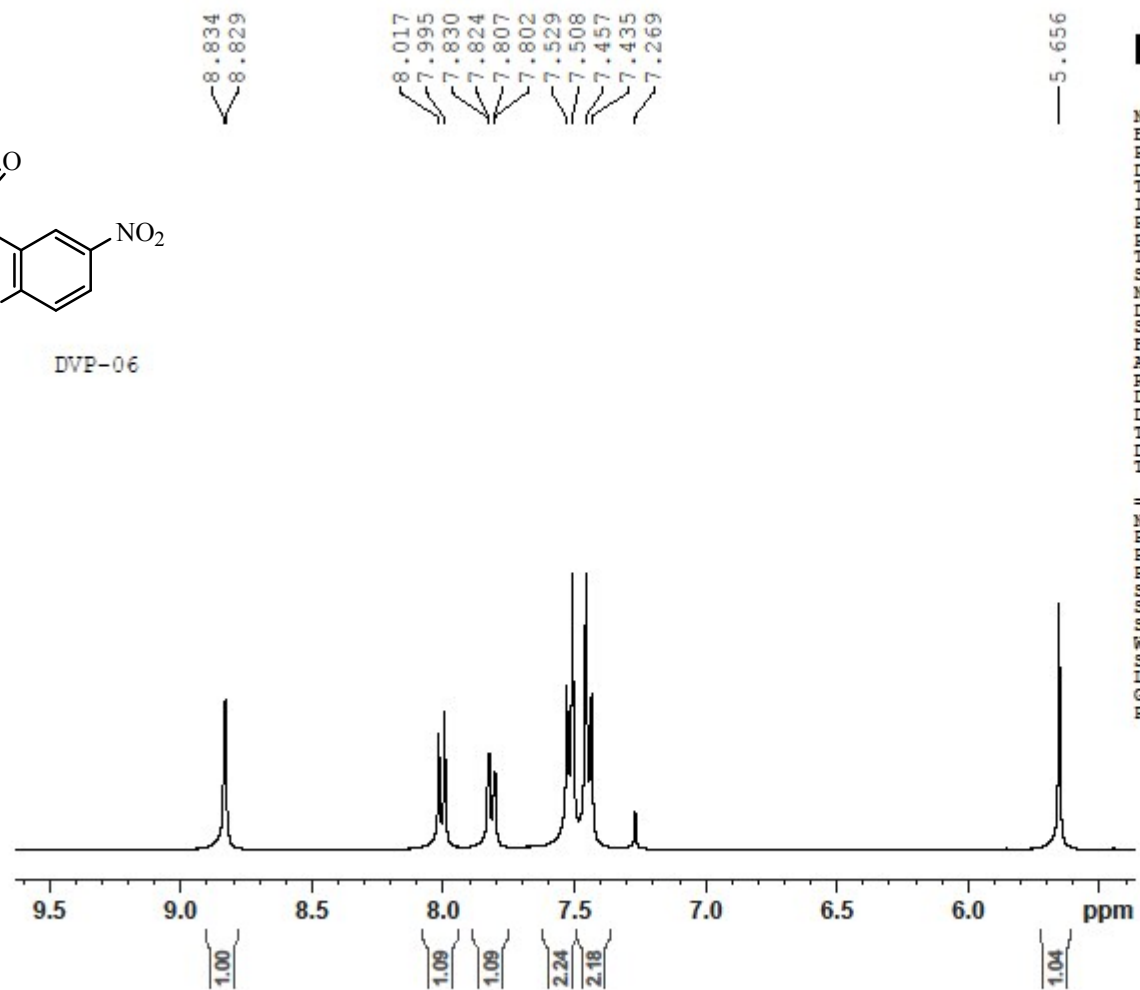

**BRUKER**

```

NAME      AD-DPA-06
EXPNO     1
PROCNO    1
Date_     20140704
Time      17.02
INSTRUM   spect
PROBHD    5 mm BBO BB-1H
PULPROG   zg30
TD         65536
SOLVENT   CDC13
NS         16
DS         2
SWH        8223.685 Hz
FIDRES     0.125483 Hz
AQ         3.9846387 sec
RG         128
DW         60.800 usec
DE         6.50 usec
TE         300.0 K
D1         1.00000000 sec
TDO        1

```

```

===== CHANNEL f1 =====
NUC1       1H
P1         14.10 usec
PL1        0.00 dB
PL1W       8.31434441 W
SFO1       400.1324710 MHz
SI         32768
SF         400.1300066 MHz
WDW        EM
SSB        0
LB         0.30 Hz
GB         0
PC         1.00

```

<sup>1</sup>H-NMR of 2-(4-Chlorophenyl)-4,4-dimethyl-9-nitro-4,5-dihydro-2H-pyrrolo[2,3,4-kl]acridin-1-one (4n)

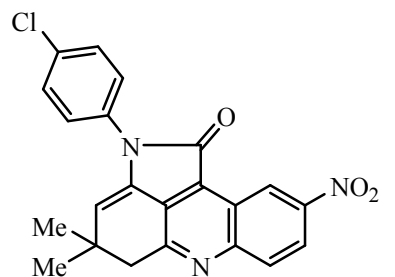

DPA-06

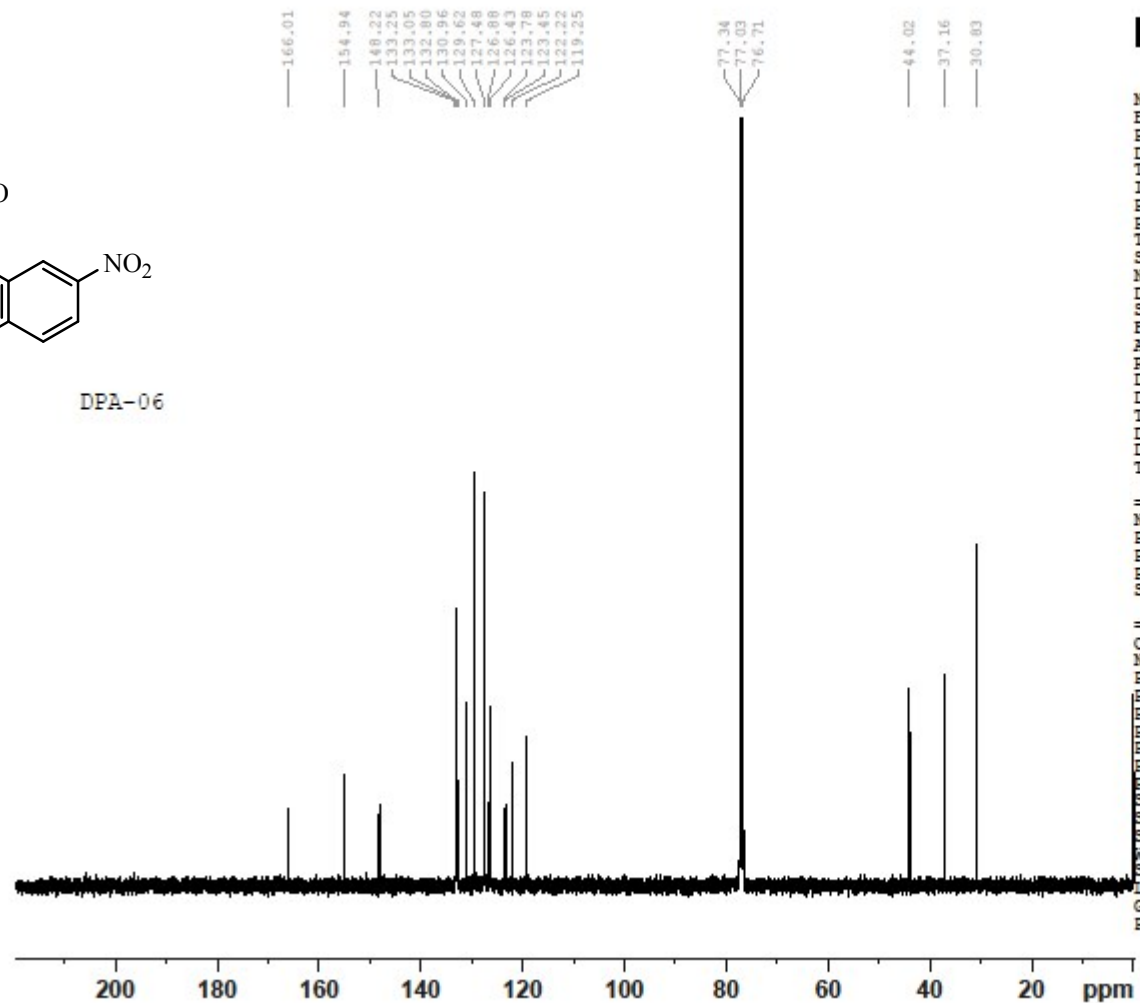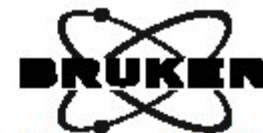

```

NAME      AD-DPA-06
EXPNO     2
PROCNO    1
Date_     20140704
Time      17.12
INSTRUM   spect
PROBHD    5 mm BBO BB-1H
PULPROG   zgpg30
TD        65536
SOLVENT   CDCl3
NS        514
DS        4
SWH       24038.461 Hz
FIDRES    0.366798 Hz
AQ        1.3631988 sec
RG        2050
DW        20.800 usec
DE        6.50 usec
TE        300.0 K
D1        2.00000000 sec
D11       0.03000000 sec
TDO       1
  
```

```

===== CHANNEL f1 =====
NUC1      13C
P1        10.00 usec
PL1       0.00 dB
PL1W     35.41759872 W
SFO1     100.6228298 MHz
  
```

```

===== CHANNEL f2 =====
CPDPRG2   waltz16
NUC2      1H
PCPD2     80.00 usec
PL2       0.00 dB
PL12     15.08 dB
PL13     18.08 dB
PL2W     8.31434441 W
PL12W    0.25812379 W
PL13W    0.12936834 W
SFO2     400.1316005 MHz
S1       32768
SF       100.6127715 MHz
WDW      EM
SSB      0
LB       1.00 Hz
GB       0
PC       1.40
  
```

 $^{13}\text{C}$ -NMR of 2-(4-Chlorophenyl)-4,4-dimethyl-9-nitro-4,5-dihydro-2H-pyrrolo[2,3,4-kl]acridin-1-one (4n)

## 6. Mass spectra of the compounds

1 / 1

NATIONAL FACILITY FOR DRUG DISCOVERY  
SAURASHTRA UNIVERSITY RAJKOT

21/06/2013

### Sample Information

Analyzed by : Admin  
Analyzed : 6/12/2013 4:24:17 PM  
Sample Name : AD-27  
Data File : E:\MS DATA\YEAR 2013\JUNE\120613\AD-27.qgd  
Method File : E:\Method\DI NFDD 300113 N.qgm  
Tuning File : E:\TUNING FILES\TUNE030613.qgt  
SEndIf\$Modified by : Admin  
Modified : 6/13/2013 4:26:15 PM

### Spectrum

Line#: 1 R Time: 6.120 (Scan#: 1225)  
MassPeaks: 163  
RawMode: Averaged 1.480-7.025 (297-1406) BasePeak: 325 (34150)  
BG Mode: 0.845 (170) Group 1 - Event 1

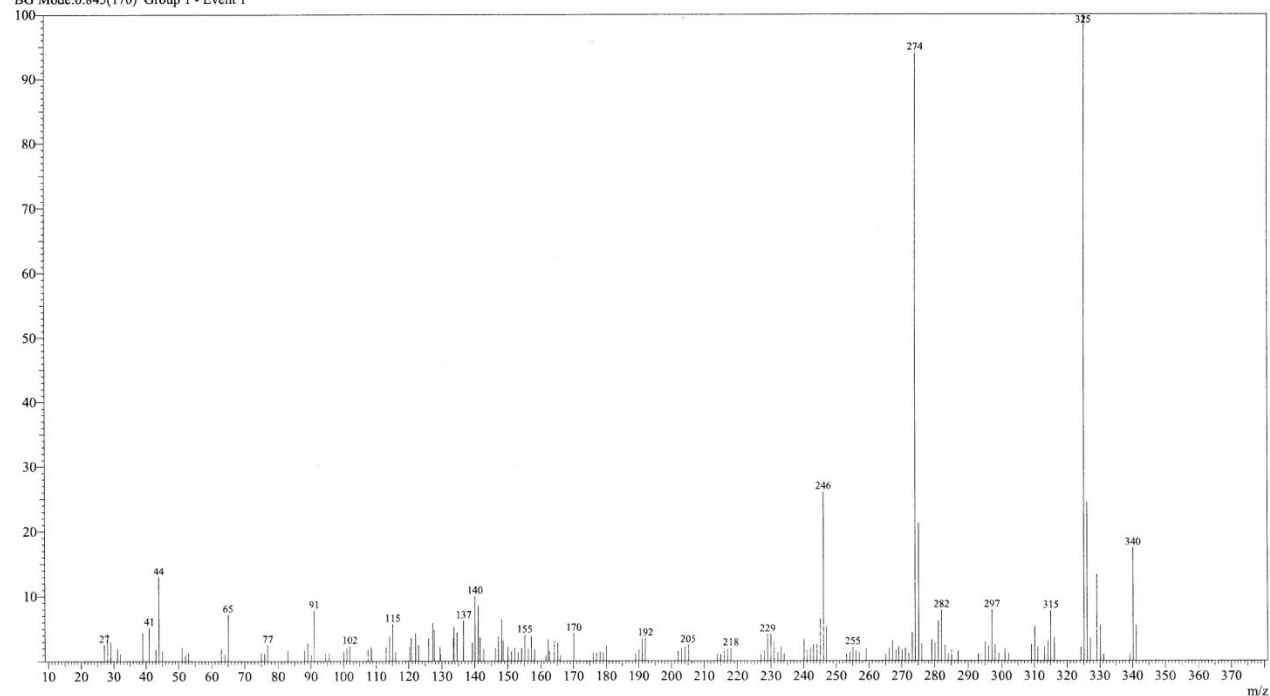

Mass spectrum of 4,4-Dimethyl-2-*p*-tolyl-4,5-dihydro-2*H*-pyrrolo[2,3,4-*k*]acridin-1-one (4b)

1 / 1

NATIONAL FACILITY FOR DRUG DISCOVERY  
SAURASHTRA UNIVERSITY RAJKOT

12/08/2014

## Sample Information

Analyzed by : PINAKIN  
Analyzed : 7/16/2014 12:44:41 PM  
Sample Name : DPA 03  
Data File : E:\MS DATA\YEAR 2014\JULY\150714\DPA03.qgd  
Method File : E:\MS DATA\YEAR 2014\JULY\150714\DPA03.pgm  
Tuning File : E:\TUNING FILES\TUNE 150714.qgt  
SEndf\$Modified by : PINAKIN  
Modified : 8/12/2014 3:29:53 PM

## Spectrum

Line#:1 R.Time:3.625(Scan#:726)  
MassPeaks:195  
RawMode:Averaged 0.000-6.920(1-1385) BasePeak:403(7533)  
BG Mode:15.850(3171) Group 1 - Event 1

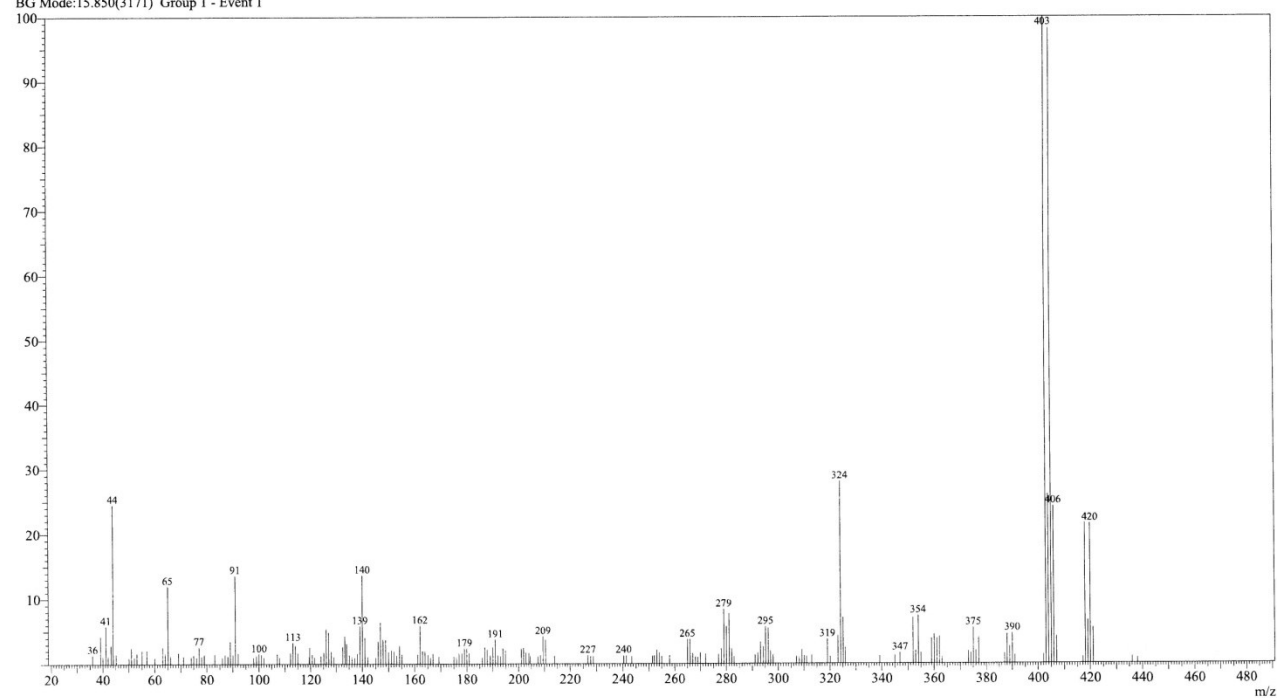

Mass spectrum of 9-Bromo-4,4-dimethyl-2-*p*-tolyl-4,5-dihydro-2*H*-pyrrolo[2,3,4-*k*]acridin-1-one (4f)

1 / 1

NATIONAL FACILITY FOR DRUG DISCOVERY  
SAURASHTRA UNIVERSITY RAJKOT

12/08/2014

## Sample Information

Analyzed by : PINAKIN  
Analyzed : 7/15/2014 3:37:40 PM  
Sample Name : DPA 04  
Data File : E:\MS DATA\YEAR 2014\JULY\150714\DPA04.qgd  
Method File : E:\DI NFDD 300113 P.qgm  
Tuning File : E:\TUNING FILES\TUNE 150714.qgt  
SEndIf\$Modified by : PINAKIN  
Modified : 8/12/2014 3:29:57 PM

## Spectrum

Line#:1 R.Time:3.515(Scan#:704)  
MassPeaks:161  
RawMode:Averaged 1.165-4.400(234-881) BasePeak:425(27962)  
BG Mode:6.480(1297) Group 1 - Event 1

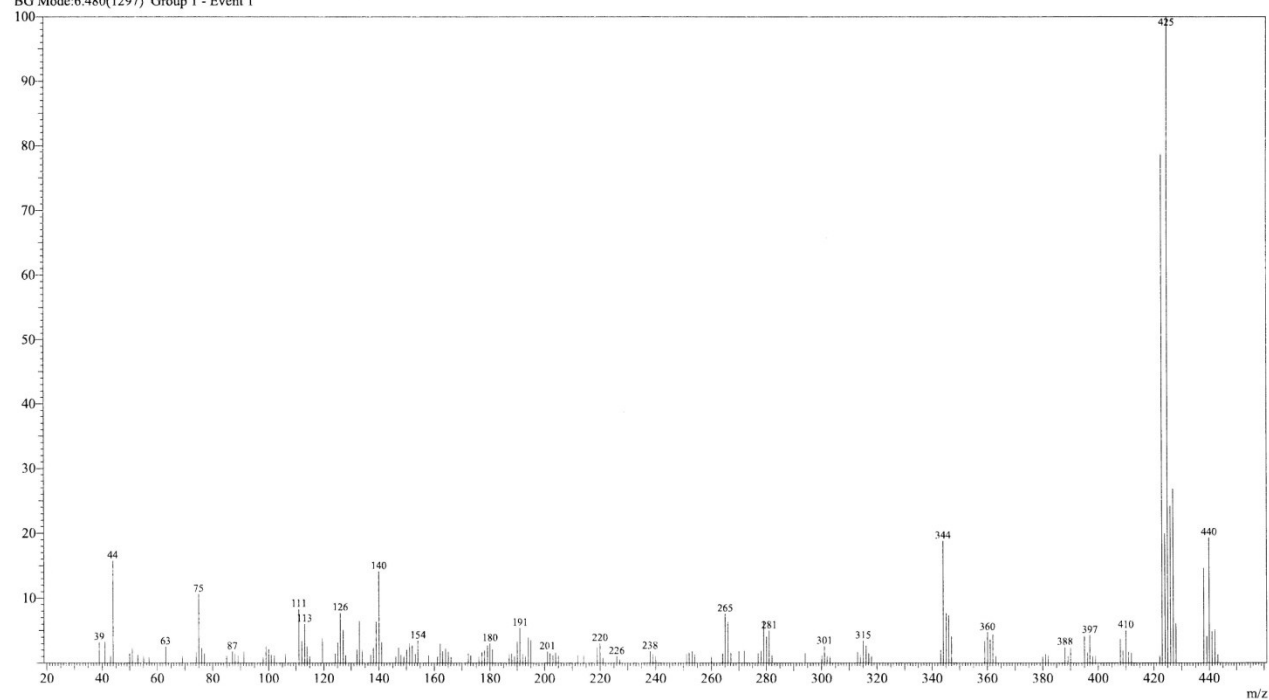

Mass spectrum of 9-Bromo-2-(4-chlorophenyl)-4,4-dimethyl-4,5-dihydro-2H-pyrrolo[2,3,4-kl]acridin-1-one (4g)

1 / 1

NATIONAL FACILITY FOR DRUG DISCOVERY  
SAURASHTRA UNIVERSITY RAJKOT

12/08/2014

## Sample Information

Analyzed by : PINAKIN  
Analyzed : 7/15/2014 4:33:20 PM  
Sample Name : DPA 01  
Data File : E:\MS DATA\YEAR 2014\JULY\150714\DPA01.qgd  
Method File : E:\DI NFDD 300113 P.qgm  
Tuning File : E:\TUNING FILES\TUNE 150714.qgt  
SEndf\$Modified by : PINAKIN  
Modified : 8/12/2014 3:29:46 PM

## Spectrum

Line#:1 R.Time:1.750(Scan#:351)  
MassPeaks:132  
RawMode:Averaged 0.165-6.680(34-1337) BasePeak:343(17967)  
BG Mode:7.855(1572) Group 1 - Event 1

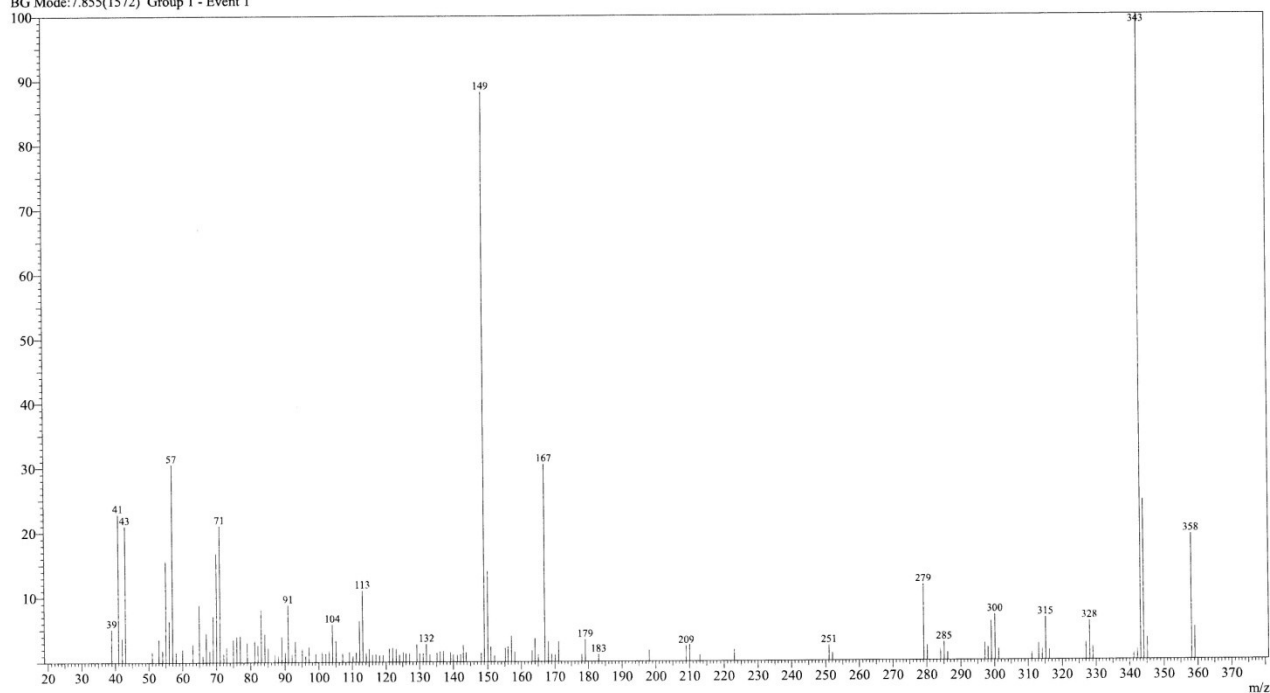

Mass spectrum of 9-Fluoro-4,4-dimethyl-2-*p*-tolyl-4,5-dihydro-2*H*-pyrrolo[2,3,4-*k*]acridin-1-one (4j)

1 / 1

NATIONAL FACILITY FOR DRUG DISCOVERY  
SAURASHTRA UNIVERSITY RAJKOT

12/08/2014

## Sample Information

Analyzed by : PINAKIN  
Analyzed : 7/15/2014 5:29:14 PM  
Sample Name : DPA 02  
Data File : E:\MS DATA\YEAR 2014\JULY\150714\DPA02.qgd  
Method File : E:\DI NFDD 300113 P.qgm  
Tuning File : E:\TUNING FILES\TUNE 150714.qgt  
SEndfSModified by : PINAKIN  
Modified : 8/12/2014 3:29:51 PM

## Spectrum

Line#: 1 R. Time: 2.045 (Scan#: 410)  
MassPeaks: 104  
RawMode: Averaged 0.030-2.955 (7-592) BasePeak: 363 (68673)  
BG Mode: 3.285 (658) Group 1 - Event 1

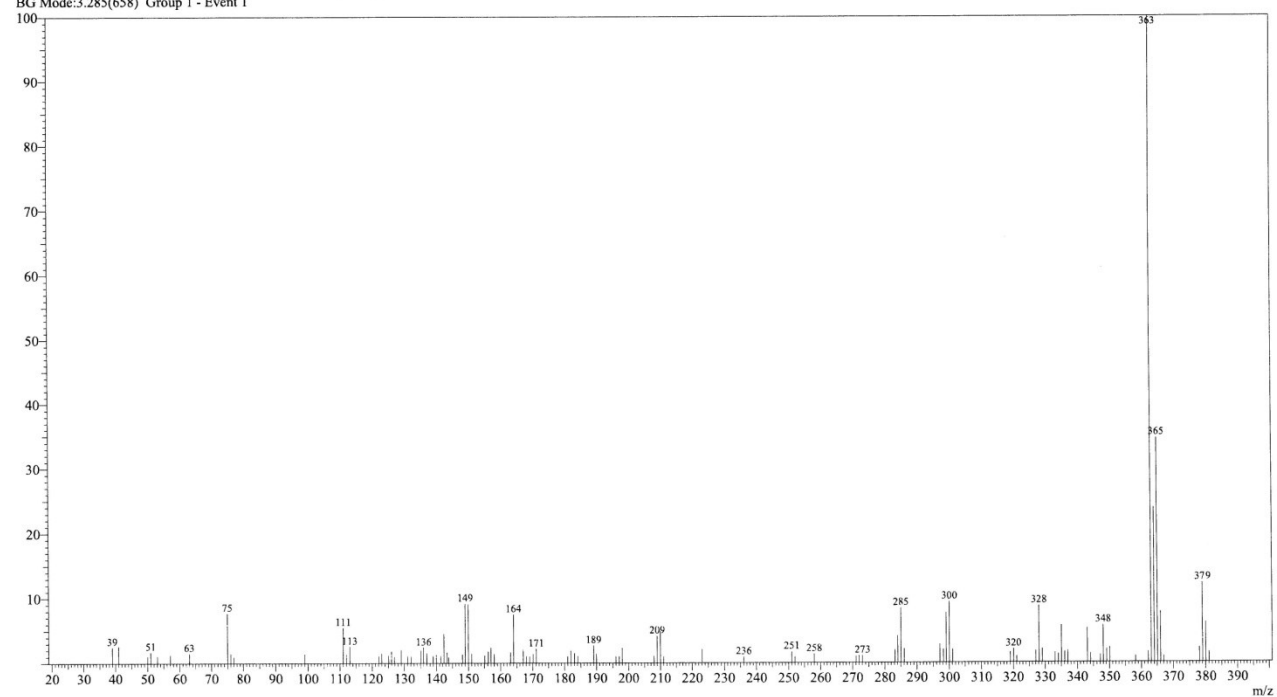

Mass spectrum of 2-(4-Chlorophenyl)-9-fluoro-4,4-dimethyl-4,5-dihydro-2H-pyrrolo[2,3,4-k]acridin-1-one (4k)

1 / 1

NATIONAL FACILITY FOR DRUG DISCOVERY  
SAURASHTRA UNIVERSITY RAJKOT

12/08/2014

Analyzed by : PINAKIN  
Analyzed : 7/16/2014 11:32:52 AM  
Sample Name : DPA 05  
Data File : E:\MS DATA\YEAR 2014\JULY\150714\DPA05.qgd  
Method File : E:\DI NFDD 300113 P.qgm  
Tuning File : E:\TUNING FILES\TUNE 150714.qgt  
SEndfSM modified by : PINAKIN  
Modified : 8/12/2014 3:30:02 PM

## Sample Information

## Spectrum

Line#:1 R.Time:2.820(Scan#:565)  
MassPeaks:157  
RawMode:Averaged 1.545-8.090(310-1619) BasePeak:319(12927)  
BG Mode:0.565(114) Group 1 - Event 1

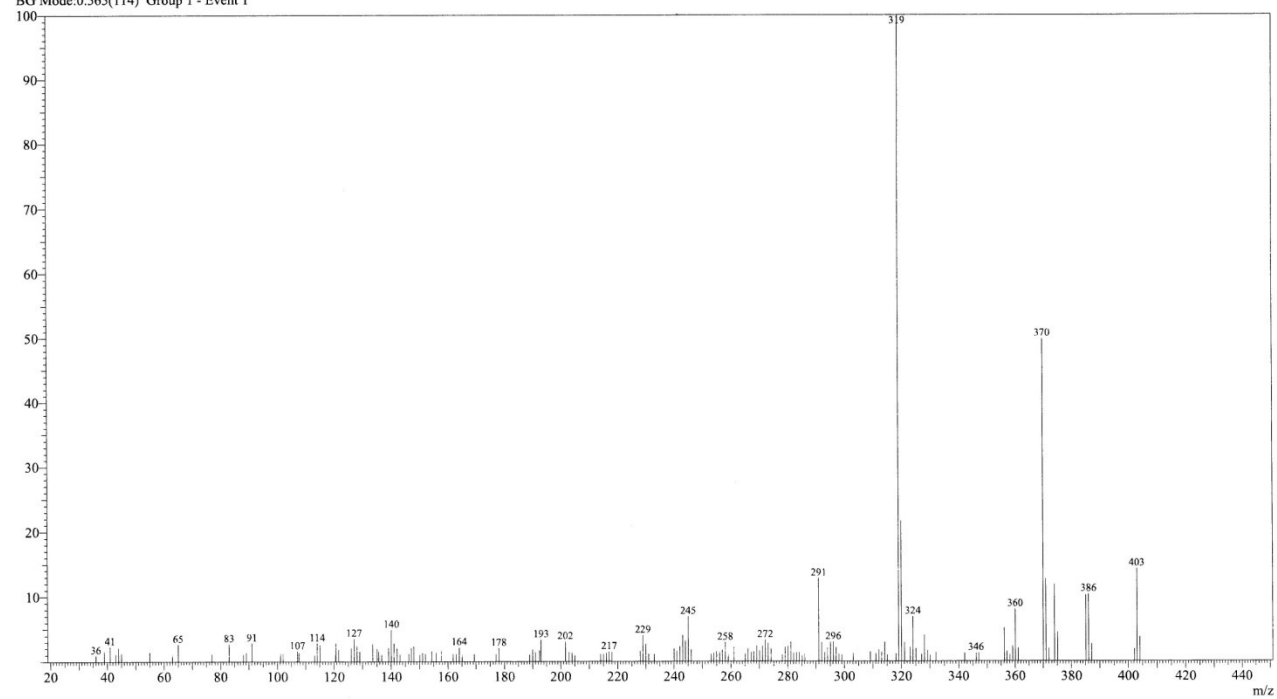

Mass spectrum of 4,4-Dimethyl-9-nitro-2-p-tolyl-4,5-dihydro-2H-pyrrolo[2,3,4-kl]acridin-1-one (4m)



1 / 1

NATIONAL FACILITY FOR DRUG DISCOVERY  
SAURASHTRA UNIVERSITY RAJKOT

21/06/2013

## Sample Information

Analyzed by : Admin  
Analyzed : 6/12/2013 3:28:39 PM  
Sample Name : AD-26  
Data File : E:\MS DATA\YEAR 2013\JUNE\120613\AD-26.qgd  
Method File : E:\Method\DI.NFDD.300113.N.qgm  
Tuning File : E:\TUNING FILES\TUNE030613.qgt  
SEndfModified by : Admin  
Modified : 6/13/2013 4:25:20 PM

## Spectrum

Line#: 1 R.Time: 3.040 (Scan#: 609)  
MassPeaks: 178  
RawMode: Averaged 1.760-3.795 (353-760) BasePeak: 325 (214081)  
BG Mode: None Group 1 - Event 1

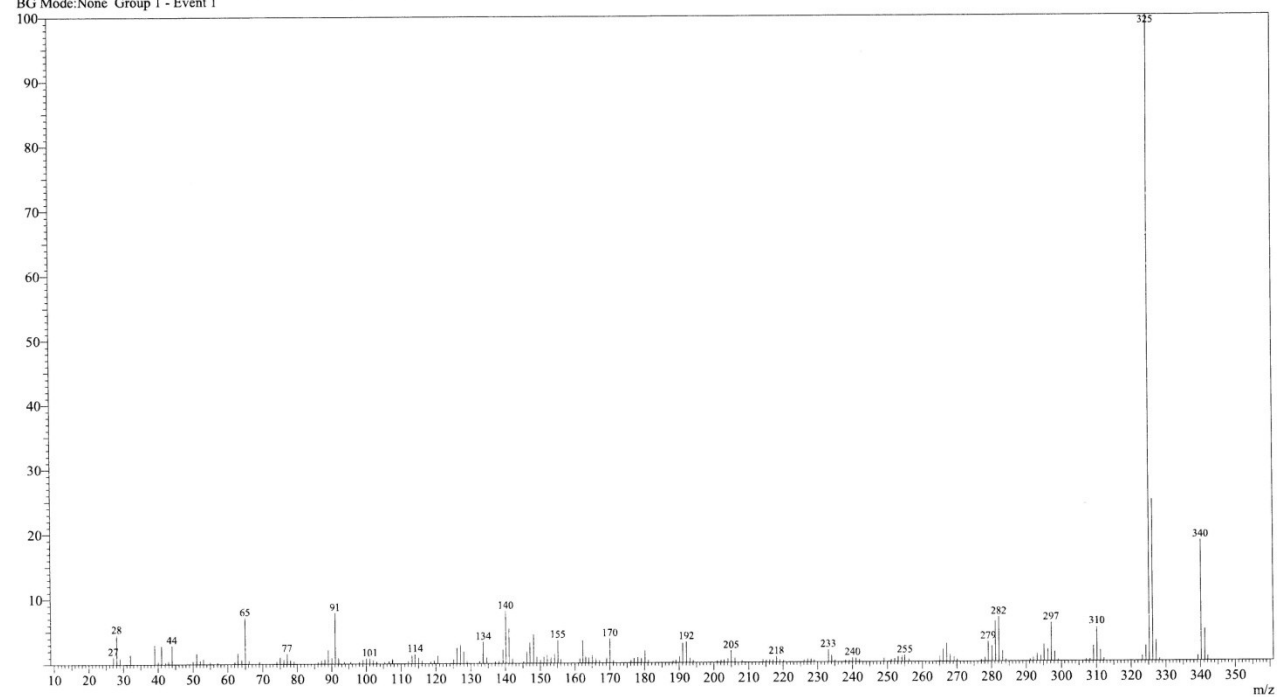

Mass spectrum of 4,4,9-Trimethyl-2-phenyl-4,5-dihydro-2H-pyrrolo[2,3,4-kl]acridin-1-one (4p)
